# Supplementary material for: Genome-Wide Association Study of Lint Percentage in Gossypium hirsutum L. Races
Source: MDPI journal article supplement (doi:10.3390/ijms241210404), 2023-06-20
Supplement: s1 [file s1]

A

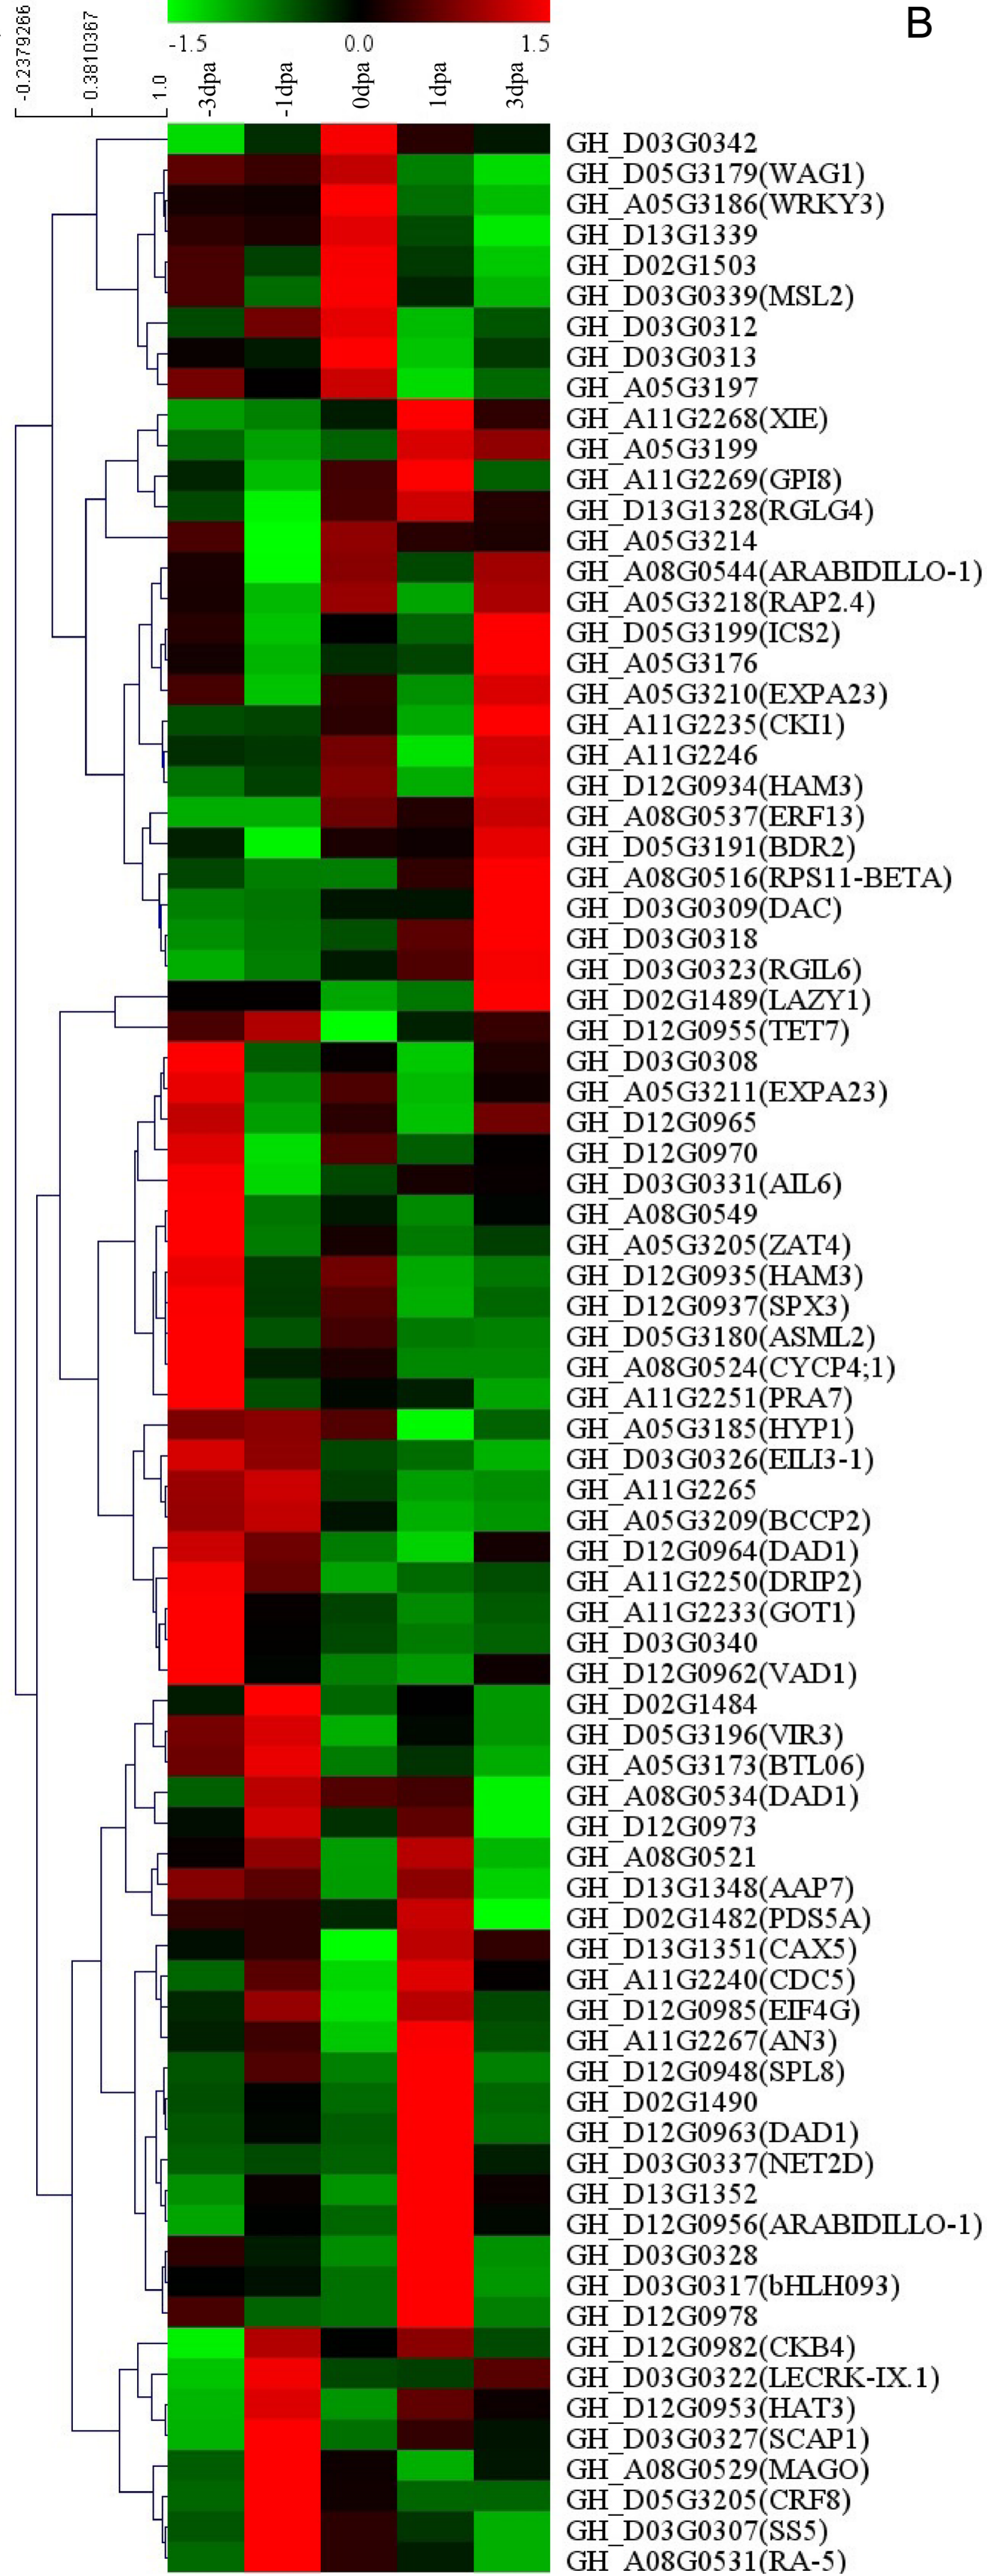

B

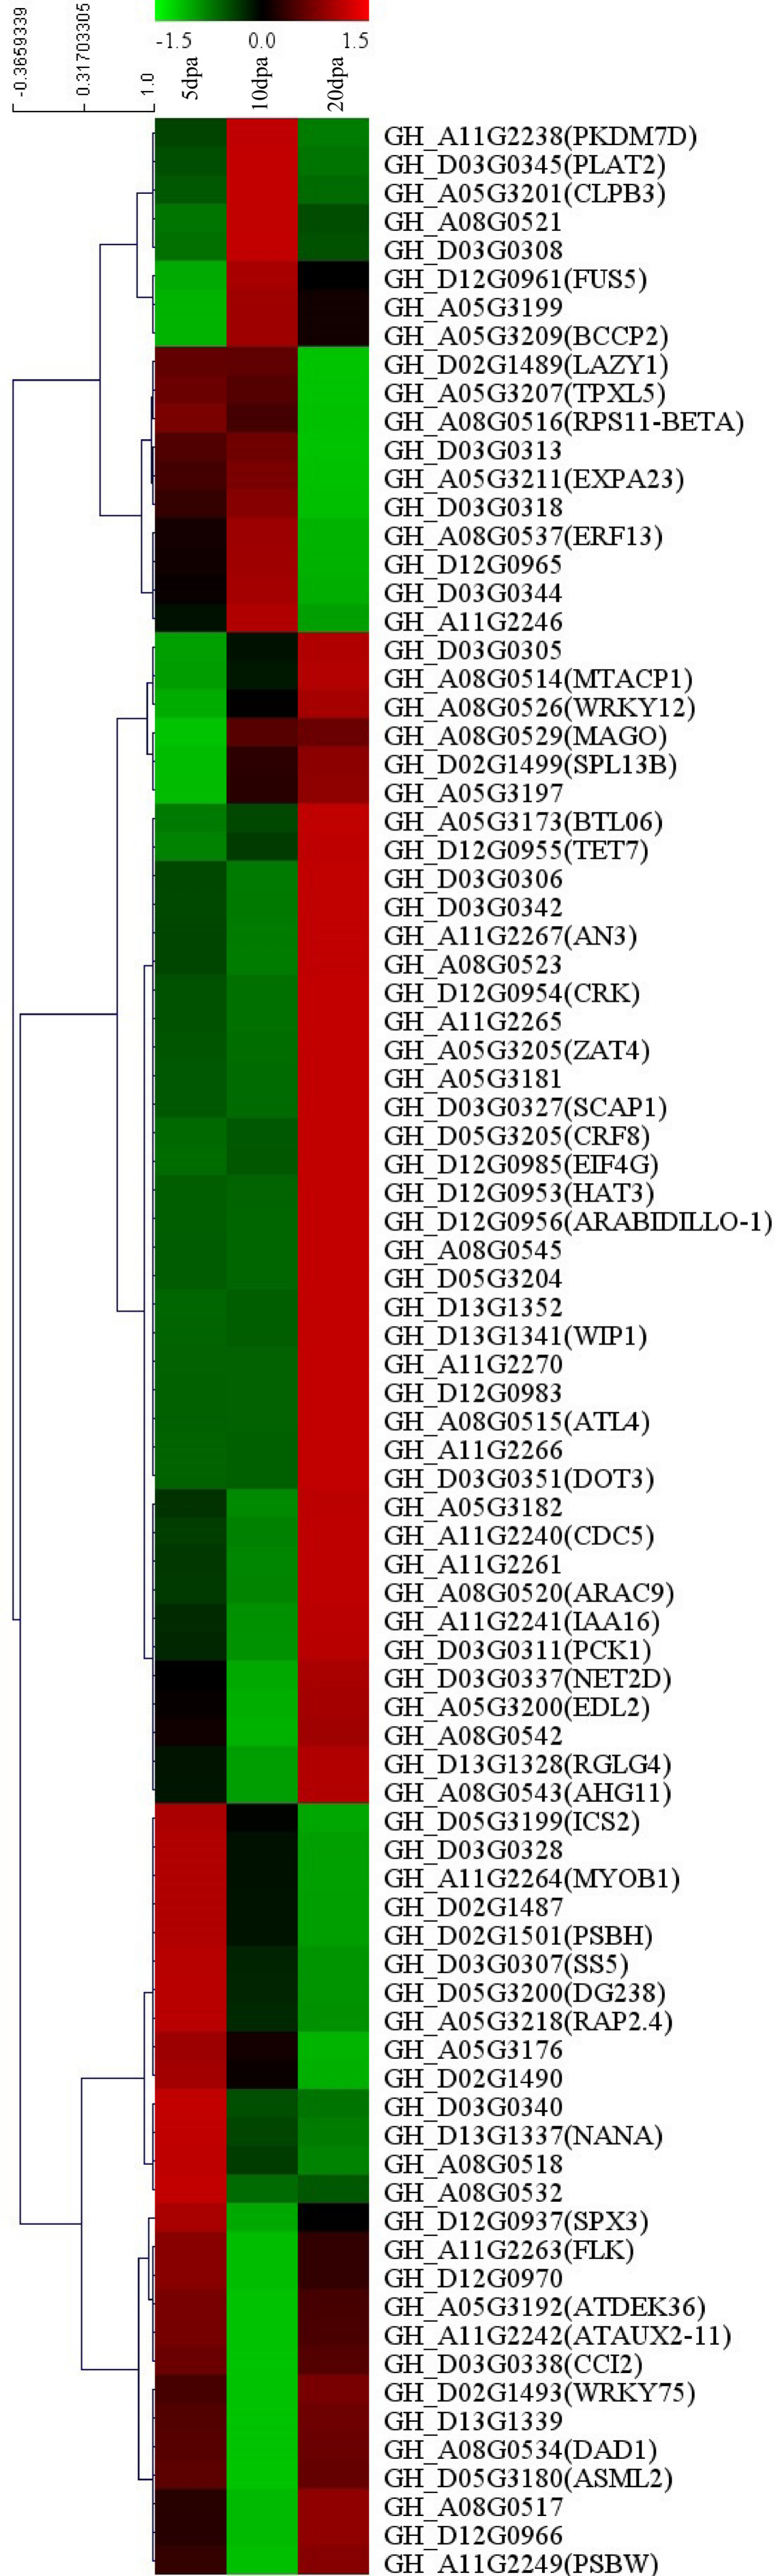

**Figure S1.** Heatmap of the expression level of candidate genes in the ovule and fiber tissues of TM-1. **(A)** The expression level of 80 genes in the ovule tissue; **(B)** The expression level of 86 genes in the fiber tissue. Red indicates high expression, and green indicates low expression.
