# Supplementary material for: Genome-Wide Association Study of Lint Percentage in Gossypium hirsutum L. Races
Source: Int J Mol Sci. 2023 Jun 20;24(12):10404. doi: 10.3390/ijms241210404 (PMC10299271; doi:10.3390/ijms241210404)
Supplement: Supplementary file 1 [file ijms-24-10404-s001.zip › Supplementary Tables.xlsx]

## Sheet: Table S1
Table S1 Correlation analyses of lint percentage between five environments
	E1	E2	E3	E4	E5
E1
E2	0.84**
E3	0.88**	0.79**
E4	0.88**	0.85**	0.85**
E5	0.88**	0.86**	0.87**	0.92**
** represents signifcance at the P<0.01 level (two-tailed)

## Sheet: Table S2
Table S2 The information of SNPs associated with lint percentage
SNP	Chr.	Pos.	model	ENV.	-lgP	Region
TM3832	A2	2386108	TMLM	E2	5.55666	Gh_A02G0210
TM3873	A2	2773148	TMLM	E2	4.78776	intergenic
TM3880	A2	2847773	TMLM	E2	4.75007	intergenic
TM3882	A2	2868334	TMLM	E2	5.4093	intergenic
TM3885	A2	2888619	TMLM	E2	5.36926	intergenic
TM3887	A2	2897247	TMLM	E2	5.25358	intergenic
TM3888	A2	2901285	TMLM	E2	5.81921	intergenic
TM3983	A2	4565159	FarmCPU	E2	6.83801	intergenic
TM5225	A2	74278842	BLINK	E3	10.8287	intergenic
TM5787	A2	83018471	BLINK	E4	5.50481	Gh_A02G1667
TM5790	A2	83039619	FarmCPU	E1	5.85131	intergenic
TM5844	A3	752708	TMLM	E2	5.3321	intergenic
TM6122	A3	4989864	TMLM	E1	5.44658	intergenic
TM6123	A3	4993774	TMLM	E1	5.44158	intergenic
TM6124	A3	4999443	TMLM	E1	5.44158	intergenic
TM6128	A3	5025301	TMLM	E1	5.35093	intergenic
TM6129	A3	5034667	TMLM	E1	5.35093	intergenic
TM6135	A3	5064026	TMLM	E1	5.31244	intergenic
TM6148	A3	5188962	TMLM	E1	5.79526	intergenic
TM6151	A3	5210712	TMLM	E1	5.79526	intergenic
TM6156	A3	5246717	TMLM	E1	5.79526	intergenic
TM6198	A3	5480191	TMLM	E1	5.02089	intergenic
TM6220	A3	5755564	TMLM	E1	4.78094	intergenic
TM6245	A3	6000457	FaST-LMM	BLUP	4.90004	Gh_A03G0336
TM6246	A3	6008064	BLINK	BLUP	6.98827	intergenic
TM6247	A3	6015363	FaST-LMM	BLUP	5.09766	intergenic
TM6248	A3	6020227	FaST-LMM	BLUP	4.90004	intergenic
TM6361	A3	8598971	BLINK	E5	12.4071	intergenic
TM6447	A3	12075527	TMLM	E1	5.23891	intergenic
TM6457	A3	12134995	TMLM	E1	5.23891	intergenic
TM6459	A3	12150396	TMLM	E1	5.23891	intergenic
TM6462	A3	12169991	TMLM	E1	5.23891	intergenic
TM6466	A3	12206490	TMLM	E1	5.23891	Gh_A03G0507
TM6480	A3	12302254	TMLM	E1	6.42148	intergenic
TM8562	A4	1704160	FarmCPU	E5	6.36718	Gh_A04G0019
TM8663	A4	2996325	TMLM	E2	5.39162	Gh_A04G0031
TM8787	A4	5125340	FarmCPU	E1	7.6874	intergenic
TM8945	A4	6759735	BLINK	E4	4.71231	intergenic
TM9015	A4	7515094	BLINK	E4	6.20808	Gh_A04G0062
TM9800	A4	59875775	FarmCPU	E2	5.55487	intergenic
TM10387	A5	7465603	FaST-LMM	E5	4.71388	intergenic
TM10532	A5	11155525	TMLM	E1	4.74892	intergenic
TM10578	A5	12448791	FarmCPU	E4	7.71889	Gh_A05G1235
TM10905	A5	20100068	FarmCPU	E3	5.0687	intergenic
TM10953	A5	21122062	BLINK	E3	15.0228	intergenic
TM11350	A5	28688090	BLINK	E5	5.15214	Gh_A05G2346
TM13159	A5	83646730	BLINK	E3	15.3785	intergenic
TM13338	A5	88528442	TMLM	E2	5.94731	intergenic
TM13339	A5	88570071	TMLM	E2	6.30381	intergenic
TM13378	A5	89288667	BLINK	E4	7.87914	intergenic
TM13445	A5	90306483	FarmCPU	E3	5.16883	intergenic
TM13486	A5	90790978	TMLM	E2	5.17758	intergenic
TM13508	A5	91280242	TMLM	E2	5.20261	intergenic
TM13587	A6	1022938	BLINK	E2	7.07196	Gh_A06G0113
TM14502	A6	32592083	TMLM	E2	4.75163	intergenic
TM14651	A6	42166393	BLINK	E2	10.4778	intergenic
TM15016	A6	64934650	TMLM	E2	4.7696	intergenic
TM15433	A6	68520584	TMLM	E2	4.77793	intergenic
TM15442	A6	68574847	TMLM	E2	4.77793	intergenic
TM15453	A6	68640167	TMLM	E2	4.75488	intergenic
TM15461	A6	68684212	TMLM	E2	4.75488	intergenic
TM15462	A6	68687218	TMLM	E2	4.75488	intergenic
TM15463	A6	68691196	TMLM	E2	4.75488	intergenic
TM15468	A6	68716988	TMLM	E2	4.77793	intergenic
TM15471	A6	68730508	TMLM	E2	4.75488	intergenic
TM15473	A6	68736421	TMLM	E2	4.75488	intergenic
TM15474	A6	68741866	TMLM	E2	4.75488	intergenic
TM15476	A6	68746975	TMLM	E2	4.75488	intergenic
TM15477	A6	68751090	TMLM	E2	4.77793	intergenic
TM15481	A6	68767676	TMLM	E2	4.77793	intergenic
TM15488	A6	68841500	TMLM	E2	4.82368	intergenic
TM15492	A6	68871105	TMLM	E2	4.84891	intergenic
TM15503	A6	68988508	TMLM	E2	4.82368	intergenic
TM15504	A6	68990751	TMLM	E2	4.82368	intergenic
TM15505	A6	68994334	TMLM	E2	4.82368	intergenic
TM15514	A6	69055178	TMLM	E2	4.84891	intergenic
TM15530	A6	69160810	TMLM	E2	4.82368	intergenic
TM15535	A6	69177656	TMLM	E2	4.78104	intergenic
TM15544	A6	69237095	TMLM	E2	4.78104	intergenic
TM15605	A6	69909552	TMLM	E2	4.82368	intergenic
TM15661	A6	70256190	TMLM	E2	4.82368	intergenic
TM15672	A6	70329090	TMLM	E2	4.82368	intergenic
TM15680	A6	70378662	TMLM	E2	4.82368	intergenic
TM15691	A6	70424776	TMLM	E2	4.82368	intergenic
TM15875	A6	72299251	TMLM	E2	5.11158	intergenic
TM16147	A6	74845468	TMLM	E2	4.81147	intergenic
TM18030	A6	95061078	FarmCPU	E2	9.23905	intergenic
TM18103	A6	96378490	TMLM	E2	5.96118	intergenic
TM18439	A6	101571036	FarmCPU	E5	4.94043	intergenic
TM18466	A6	101853567	BLINK	E2	5.81995	intergenic
TM20065	A7	27403656	BLINK	E4	6.8511	intergenic
TM20068	A7	27678658	BLINK	E5	21.3249	intergenic
TM20242	A7	39975155	BLINK	E5	6.11404	intergenic
TM20999	A7	69042760	BLINK	E4	4.84011	intergenic
TM21373	A7	72919308	BLINK	E2	12.3319	Gh_A07G1805
TM21439	A7	73820001	FaST-LMM	E2	6.89761	intergenic
TM21522	A7	74908404	FarmCPU	E3	7.84219	intergenic
TM21769	A8	587653	TMLM	E2	5.26882	intergenic
TM21770	A8	595637	TMLM	E2	5.36222	intergenic
TM21794	A8	809723	TMLM	E2	4.72577	intergenic
TM21821	A8	1716195	FarmCPU	E4	7.12259	Gh_A08G0171
TM22226	A8	8180911	BLINK	E4	11.194	Gh_A08G0534
TM26806	A8	57161995	TMLM	E2	5.26567	intergenic
TM28893	A8	77510384	FarmCPU	E2	7.3446	intergenic
TM34057	A10	10927949	FarmCPU	E2	7.9974	Gh_A10G0656
TM34291	A10	20696720	BLINK	E5	4.89321	intergenic
TM34295	A10	20716186	BLINK	E5	4.97545	intergenic
TM36131	A10	88407052	FarmCPU	E1	7.4013	intergenic
TM36787	A10	98706733	FarmCPU	E1	5.98769	intergenic
TM36838	A10	99468736	FarmCPU	E2	6.64847	intergenic
TM37105	A11	2818663	BLINK	E2	8.0252	intergenic
TM37243	A11	6986587	BLINK	E5	7.58931	intergenic
TM37451	A11	15188688	FarmCPU	E3	4.96485	Gh_A11G1229
TM37916	A11	21628871	FarmCPU	E4	7.01167	Gh_A11G1521
TM38124	A11	27047808	FarmCPU	E2	5.96746	intergenic
TM38571	A11	58137941	FarmCPU	E4	5.92343	intergenic
TM38921	A11	65498934	FarmCPU	E2	6.45322	intergenic
TM39049	A11	68820088	FarmCPU	E4	6.36777	intergenic
TM39097	A11	77128215	MLM	E2	5.40563	intergenic
TM39099	A11	77136114	MLM	E2	5.2727	intergenic
TM39100	A11	77139909	MLM	E2	5.2727	intergenic
TM39101	A11	77145354	MLM	E2	5.2727	intergenic
TM39105	A11	77162385	MLM	E2	4.94083	intergenic
TM39106	A11	77164685	MLM	E2	5.2727	intergenic
TM39107	A11	77164685	MLM	E2	4.80325	intergenic
TM39108	A11	77184403	MLM	E2	5.07752	intergenic
TM39109	A11	77187920	TMLM	E2	4.9189	intergenic
TM39111	A11	77201721	MLM	E2	5.22427	Gh_A11G2242
TM39112	A11	77204435	MLM	E2	5.09462	intergenic
TM39113	A11	77207688	TMLM	E2	4.99551	intergenic
TM39114	A11	77220231	TMLM	E2	5.03805	intergenic
TM39118	A11	77245152	MLM	E2	5.73381	intergenic
TM39119	A11	77250629	FarmCPU	E2	7.05489	Gh_A11G2243
TM39120	A11	77254990	MLM	E2	5.6488	intergenic
TM39121	A11	77259287	MLM	E2	5.7197	intergenic
TM39122	A11	77267198	MLM	E2	5.59498	Gh_A11G2244
TM39136	A11	77356582	BLINK	E1	5.59471	intergenic
TM40104	A12	2269194	BLINK	E3	5.96531	intergenic
TM42489	A12	72947838	MLM	E2	4.86931	Gh_A12G1423
TM42527	A12	73222779	BLINK	E1	7.28789	intergenic
TM42542	A12	73346911	BLINK	E1	8.46084	intergenic
TM42563	A12	73856986	BLINK	E2	7.13626	intergenic
TM42999	A12	84063178	BLINK	E3	7.88047	intergenic
TM43044	A12	85199072	BLINK	E3	6.74638	Gh_A12G2254
TM43182	A13	544736	BLINK	E3	12.019	Gh_A13G0051
TM43569	A13	9662739	BLINK	E5	9.94877	intergenic
TM43578	A13	10386344	FarmCPU	E1	5.42173	Gh_A13G0479
TM46588	A13	60134206	FarmCPU	E1	6.91905	intergenic
TM47157	A13	69819570	FarmCPU	E2	9.33272	intergenic
TM47373	A13	72835782	BLINK	E3	7.0556	intergenic
TM47574	A13	75690889	BLINK	E4	5.03031	intergenic
TM47856	D1	1930197	TMLM	E2	5.56438	Gh_D01G0226
TM47857	D1	1933401	TMLM	E2	5.27475	Gh_D01G0227
TM47862	D1	2032223	TMLM	E2	5.3723	intergenic
TM48143	D1	6201180	FarmCPU	E3	4.92175	intergenic
TM48144	D1	6206505	BLINK	E3	10.3148	intergenic
TM48372	D1	13215436	TMLM	E2	4.87403	intergenic
TM48373	D1	13233866	TMLM	E2	4.87403	intergenic
TM49111	D1	43015199	TMLM	E1	4.87507	intergenic
TM49718	D1	54900449	BLINK	E1	7.35185	intergenic
TM50150	D1	59567569	BLINK	E4	10.2305	intergenic
TM50464	D2	2963556	FarmCPU	E1	4.95465	Gh_D02G0258
TM50491	D2	3153680	FarmCPU	E4	4.92788	Gh_D02G0273
TM50592	D2	4995981	FarmCPU	E4	5.80966	Gh_D02G0383
TM52184	D2	51543776	BLINK	E4	6.60204	intergenic
TM53187	D2	63971555	FarmCPU	E3	4.78788	intergenic
TM53197	D2	64206361	FarmCPU	E1	4.77061	Gh_D02G2001
TM53588	D3	4016585	BLINK	E4	14.3853	intergenic
TM53778	D3	12660347	BLINK	E3	9.0276	intergenic
TM55461	D4	2087134	BLINK	E2	9.28812	intergenic
TM55484	D4	2902882	FarmCPU	E5	10.0121	intergenic
TM55582	D4	3824554	FarmCPU	E2	6.7969	intergenic
TM55814	D4	7604344	TMLM	E2	5.36583	intergenic
TM55815	D4	7611830	TMLM	E2	5.23244	intergenic
TM55817	D4	7622861	FaST-LMM	E2	5.35022	intergenic
TM55818	D4	7626998	TMLM	E2	5.55994	intergenic
TM55819	D4	7631258	FaST-LMM	E2	5.35022	intergenic
TM56637	D4	49921072	BLINK	E3	5.43111	Gh_D04G1763
TM56730	D5	770971	TMLM	E1	5.12406	intergenic
TM57000	D5	6780378	TMLM	E3	4.8165	intergenic
TM57002	D5	6810289	TMLM	E1	4.85397	intergenic
TM57144	D5	9627604	BLINK	E4	12.9259	intergenic
TM57328	D5	16607201	BLINK	E1	7.56614	intergenic
TM57447	D5	19510470	BLINK	E3	15.96	Gh_D05G2096
TM57450	D5	19562356	FarmCPU	E1	6.04832	Gh_D05G2098
TM57478	D5	19820229	BLINK	E4	13.8347	intergenic
TM57486	D5	20068395	FarmCPU	E2	5.45383	intergenic
TM57488	D5	20078804	FarmCPU	E2	4.87098	intergenic
TM57525	D5	20819303	BLINK	E3	9.17776	intergenic
TM57590	D5	23885111	BLINK	E3	11.3628	Gh_D05G2398
TM57786	D5	27649835	TMLM	E1	5.06621	intergenic
TM58234	D5	42829414	TMLM	E1	4.97009	intergenic
TM58314	D5	49232321	TMLM	E1	5.18369	intergenic
TM58932	D6	1082523	BLINK	E3	7.19099	intergenic
TM59367	D6	7828943	TMLM	E2	4.7447	intergenic
TM61989	D6	50076364	FarmCPU	E2	6.76113	intergenic
TM62867	D6	58423318	TMLM	E1	5.10129	intergenic
TM63142	D6	63840524	BLINK	E2	12.3048	intergenic
TM63426	D7	5867791	BLINK	E3	5.93084	intergenic
TM66975	D8	2324738	BLINK	E1	8.59782	intergenic
TM67276	D8	6813714	BLINK	E4	6.55668	intergenic
TM67307	D8	7395585	FarmCPU	E4	7.89557	intergenic
TM68186	D8	19441155	TMLM	E2	5.27666	intergenic
TM68752	D8	42491068	TMLM	E2	5.88897	intergenic
TM68779	D8	43434096	TMLM	E2	5.28461	intergenic
TM68792	D8	43518524	TMLM	E2	5.30203	intergenic
TM68796	D8	43543905	TMLM	E2	5.35242	intergenic
TM68823	D8	43768535	TMLM	E2	5.26955	intergenic
TM68831	D8	43823198	TMLM	E2	5.30699	Gh_D08G1340
TM68837	D8	43866869	TMLM	E2	5.57424	Gh_D08G1340
TM68842	D8	43887707	TMLM	E2	5.30699	Gh_D08G1340
TM68849	D8	43924396	TMLM	E2	5.28003	intergenic
TM68856	D8	43963829	TMLM	E2	5.39885	intergenic
TM68859	D8	43986271	TMLM	E2	5.39885	intergenic
TM68861	D8	43997848	TMLM	E2	5.39885	intergenic
TM68863	D8	44015895	TMLM	E2	5.27554	intergenic
TM68865	D8	44021822	TMLM	E2	6.06843	intergenic
TM68866	D8	44026981	TMLM	E2	5.66833	intergenic
TM68868	D8	44036787	TMLM	E2	5.66833	intergenic
TM68869	D8	44043689	TMLM	E2	5.66833	intergenic
TM68870	D8	44048632	TMLM	E2	5.72886	intergenic
TM68953	D8	45095416	TMLM	E2	5.2805	intergenic
TM68956	D8	45105508	TMLM	E2	5.2805	intergenic
TM68957	D8	45112282	TMLM	E2	5.2805	intergenic
TM68959	D8	45127518	TMLM	E2	5.28479	intergenic
TM68965	D8	45181213	TMLM	E2	5.35287	intergenic
TM68967	D8	45187565	TMLM	E2	5.27738	intergenic
TM69172	D8	53049470	FarmCPU	E3	5.35479	intergenic
TM69189	D8	53279497	BLINK	E3	7.01967	Gh_D08G1713
TM69216	D8	53633027	FarmCPU	E1	5.75869	intergenic
TM69722	D8	61645558	BLINK	E4	10.6289	Gh_D08G2210
TM69796	D8	63041117	TMLM	E2	4.8144	Gh_D08G2331
TM69797	D8	63048800	TMLM	E2	4.8144	intergenic
TM69821	D8	63800023	TMLM	E2	4.83672	Gh_D08G2389
TM69823	D8	63813362	TMLM	E2	4.76268	intergenic
TM69839	D8	64020307	TMLM	E2	4.81836	intergenic
TM70066	D9	2247461	FarmCPU	E3	5.93481	intergenic
TM70195	D9	4164768	BLINK	E2	6.80282	intergenic
TM71861	D9	29343732	BLINK	BLUP	7.57812	intergenic
TM72016	D9	33783824	MLM	E2	5.03428	Gh_D09G0869
TM72022	D9	33929325	TMLM	E2	4.92941	Gh_D09G0880
TM72023	D9	33932461	TMLM	E2	4.92941	Gh_D09G0881
TM72048	D9	34218762	FarmCPU	E4	9.069	intergenic
TM72173	D9	37317398	TMLM	E2	4.76828	intergenic
TM72205	D9	38133425	BLINK	E4	5.46757	intergenic
TM72587	D9	43752600	BLINK	E3	8.10242	intergenic
TM72669	D9	45277536	BLINK	E2	6.54966	Gh_D09G1762
TM72828	D9	47404161	BLINK	E3	13.3629	Gh_D09G1994
TM73167	D10	2062078	BLINK	E3	9.31275	intergenic
TM73642	D10	8030303	FarmCPU	E3	5.42258	intergenic
TM74063	D10	23186113	TMLM	E2	5.61764	intergenic
TM75017	D10	58300092	BLINK	E4	13.1176	Gh_D10G2133
TM75209	D10	62456798	BLINK	E3	7.70841	intergenic
TM75231	D10	62907470	FarmCPU	E4	8.15817	Gh_D10G2390
TM75295	D11	1389894	TMLM	E2	5.18596	intergenic
TM75702	D11	9939554	FarmCPU	E2	6.26079	intergenic
TM76204	D11	24111532	FarmCPU	E3	5.21693	intergenic
TM76369	D11	48065231	BLINK	E2	7.08332	intergenic
TM76963	D11	57095734	BLINK	E2	4.89113	intergenic
TM77292	D12	771233	BLINK	E2	11.3414	Gh_D12G0467
TM77318	D12	1430911	FarmCPU	E3	6.12845	intergenic
TM77549	D12	4383606	FarmCPU	E5	5.48674	intergenic
TM78526	D12	34893826	FarmCPU	E3	5.1605	intergenic
TM78556	D12	36349233	FaST-LMM	E2	4.83586	intergenic
TM78960	D12	42554880	FarmCPU	E2	8.80363	Gh_D12G1374
TM79268	D12	48170142	BLINK	E3	6.49154	intergenic
TM80047	D13	786948	BLINK	E4	5.50722	intergenic
TM80063	D13	1184982	BLINK	E2	4.79169	Gh_D13G0119
TM80085	D13	1488519	BLINK	E5	13.1569	intergenic
TM80159	D13	2590468	FarmCPU	E5	5.06383	Gh_D13G0266
TM80160	D13	2596706	FarmCPU	E4	8.33403	Gh_D13G0267
TM80254	D13	4105612	TMLM	E2	4.71847	Gh_D13G0381
TM80255	D13	4107861	TMLM	E2	4.71847	Gh_D13G0381
TM81325	D13	42144468	BLINK	E1	5.02649	intergenic

## Sheet: Table S3
Table S3 The distribution of these previously reported QTL/markers
Chr	LM	AM	LM+AM	Chr	LM	AM	LM+AM
A1	6	33	39	D1	13	67	80
A2	8	317	325	D2	19	136	155
A3	25	44	69	D3	25	100	125
A4	5	21	26	D4	6	42	48
A5	13	53	66	D5	15	86	101
A6	2	52	54	D6	12	52	64
A7	8	67	75	D7	29	79	108
A8	4	385	389	D8	15	50	65
A9	9	36	45	D9	18	41	59
A10	16	62	78	D10	7	68	75
A11	9	46	55	D11	8	284	292
A12	9	85	94	D12	10	63	73
A13	15	62	77	D13	7	33	40
At	129	1263	1392	Dt	184	1101	1285

## Sheet: Table S4
Table S4 Genes that contain significantly associated SNP loci detected repeatedly
Gene ID	SNP	Chromosome	Position
Gh_A08G0534	TM22226	A8	8180911
Gh_D13G0266	TM80159	D13	2590468
Gh_A11G2242	TM39111	A11	77201721
Gh_A11G2243	TM39119	A11	77250629
Gh_A11G2244	TM39122	A11	77267198
Gh_D02G2001	TM53197	D2	64206361
Gh_A03G0336	TM6245	A3	6000457
Gh_D10G2133	TM75017	D10	58300092
Gh_A04G0019	TM8562	A4	1704160

## Sheet: Table S5
Table S5 Comparison of phenotypes between alleles of the eleven associated SNPs in five environments
SNP	Chr	Pos.	Genotype	E1	E2	E3	E4	E5
TM13159	A5	83646730	AG	35.968**	34.676**	35.499**	33.07**	32.283**
			GG	28.325	25.409	25.904	24.331	24.314
TM22226	A8	8180911	AA	26.078	22.905	24.639	21.947	22.5
			GG	32.51**	30.176**	30.015**	28.906**	28.387**
TM39136	A11	77356582	AA	27.745	24.809	25.253	23.721	23.879
			AT	34.542**	32.9**	32.986**	31.367**	30.501**
TM52184	D2	51543776	AA	33.644**	31.4**	31.402**	29.966**	29.431**
			TT	26.488	23.447	24.448	22.605	23.026
TM53588	D3	4016585	AA	34.665**	32.788**	32.584**	31.277**	31.034**
			GG	27.877	24.927	25.648	23.809	23.8
TM57002	D5	6810289	AA	27.925	25.096	25.942	23.83	24.09
			CC	31.618**	29.411**	29.258**	28.465**	27.781**
TM57478	D5	19820229	AA	36.168**	34.206**	34.124**	33.355**	33.199**
			GG	28.801	26.15	26.602	24.873	24.65
TM57486	D5	20068395	AC	31.636**	29.041*	30.159**	28.224**	28.33**
			CC	29.304	26.865	26.663	25.456	24.976
TM58314	D5	49232321	AA	32.624**	30.691**	29.993**	28.863**	28.619**
			GG	29.225	26.539	27.069	25.653	25.461
TM78526	D12	34893826	AG	32.525**	31.723**	29.514	30.39**	28.851**
			GG	29.744	26.791	27.718	25.669	25.734
TM81325	D13	42144468	AG	36.58**	35.44**	34.769**	33.426**	32.871**
			GG	28.704	25.97	26.467	24.884	24.734
**, significant at a=0.01 level.

## Sheet: Table S6
Table S6 A list of genes might be involved in fiber initiation
Gene	Ovule					Homologue	Other names	Gene annotation
	-3dpa	-1dpa	0dpa	1dpa	3dpa
GH_A11G2268	0	1.20665	1.99225	4.29152	2.59647	AT1G54560.2	XIE	actin filament organization, pollen tube growth, vesicle transport along actin filament
GH_D12G0948	1.28495	2.3825	0	3.58676	0	AT1G02065.1	SPL8	anther development, megasporogenesis, microsporogenesis
GH_D05G3205	0.131528	2.92586	0	0.137299	0.156231	AT1G71130.1	CRF8	carbohydrate derivative metabolic process, cellular lipid metabolic process, lipid biosynthetic process, phosphate-containing compound metabolic process, response to abscisic acid, response to temperature stimulus, response to water deprivation
GH_D02G1489	0	0	0.192294	0.412416	2.23254	AT5G14090.1	LAZY1	gravitropism, regulation of auxin polar transport
GH_A08G0537	0	0	1.89153	1.66112	2.17826	AT2G44840.1	ERF13	ethylene-activated signaling pathway; regulation of transcription, DNA-templated
GH_D12G0982	0.023259	2.10032	1.20469	1.90485	0.851135	AT2G44680.1	CKB4	circadian rhythm, photoperiodism, flowering, positive regulation of circadian rhythm
GH_D03G0318	0.340219	1.00466	2.24976	7.4174	12.3661	AT5G05800.5		negative regulation of metabolic process
GH_D12G0935	6.27336	1.92367	4.47073	0.329091	1.04159	AT4G00150.1	HAM3	cell differentiation, cell division, circadian rhythm, regulation of transcription, DNA-templated, root hair cell tip growth
GH_A08G0521	2.07802	3.35792	0.509379	3.73828	0.258765	AT1G28710.4		flower development
GH_D03G0308	3.49015	1.09543	1.79601	0.363095	1.97796	AT2G22720.6		regulation of reproductive process; histone exchange, nucleosome assembly, regulation of chromatin assembly, regulation of transcription, DNA-templated
GH_D05G3199	4.14304	0.884425	3.63589	2.20496	7.10933	AT1G18870.1	ICS2	biosynthetic process, phylloquinone biosynthetic process, salicylic acid biosynthetic process
GH_A05G3211	14.0713	3.11608	9.52692	1.75665	7.74308	AT5G39280.1	EXPA23	plant-type cell wall loosening, unidimensional cell growth
GH_D03G0309	1.10581	1.29194	3.09122	3.10186	8.84905	AT3G17930.1	DAC	cytochrome b6f complex assembly; chloroplast, chloroplast thylakoid membrane
GH_D13G1352	0.825127	2.68549	0.771529	5.76889	2.73036	AT5G56100.1		lipid storage
GH_D03G0337	5.57621	7.47554	5.42624	40.0096	11.2617	AT2G22560.1	NET2D	plant epidermis development, plant-type cell wall organization or biogenesis, response to water deprivation
GH_A11G2240	19.8766	40.17	8.03859	54.3508	31.3468	AT1G09770.1	CDC5	defense response to bacterium, defense response to fungus, regulation of transcription, DNA-templated
GH_A08G0549	2.25728	0.502748	0.906412	0.409275	0.988523	AT4G13970.1		cellular protein localization, meristem development, regulation of multicellular organismal development
GH_D05G3196	2.36085	2.95776	0.551693	1.56617	0.695921	AT1G56180.1	VIR3	leaf development
GH_D02G1484	3.71763	8.67581	2.50369	4.12648	1.71686	AT2G01275.4		protein ubiquitination
GH_A05G3176	4.32742	1.58024	3.43421	3.1244	7.79795	AT3G59650.1		mitochondrial translation; cellular component biogenesis
GH_D12G0937	173.6	74.1739	119.151	36.5252	59.3839	AT2G45130.1	SPX3	cellular response to phosphate starvation, positive regulation of cellular response to phosphate starvation
GH_D02G1490	37.8569	57.1911	30.4692	134.863	31.5089	AT5G41980.1		flower development
GH_A11G2233	5.3353	2.62867	1.91207	1.20912	1.66789	AT3G03180.3	GOT1	endoplasmic reticulum to Golgi vesicle-mediated transport, retrograde transport, endosome to Golgi
GH_D12G0965	63.0647	19.6085	44.5942	15.1099	53.1793	AT3G60300.1		response to light stimulus; protein ubiquitination
GH_A05G3185	14.2433	14.6171	13.1221	4.03566	8.1889	AT3G01100.1	HYP1	cellular catabolic process, growth
GH_D03G0340	41.6941	21.2465	15.7379	12.1188	13.9032	AT5G65470.1		defense response to other organism, growth, plant-type cell wall biogenesis, regulation of defense response, secondary metabolic process, signal transduction
GH_A11G2235	7.62791	7.88692	10.9788	5.09967	17.295	AT4G14340.1	CKI1	phosphorylation, protein autophosphorylation, protein phosphorylation
GH_A05G3173	5.98982	7.66754	2.91742	3.89553	2.28288	AT1G55530.2	BTL06	protein ubiquitination
GH_D03G0312	37.5459	61.9493	76.9403	22.9528	36.1759	AT3G49640.1		tRNA dihydrouridine synthesis
GH_A11G2265	8.70281	9.60047	4.72785	2.89857	3.2113	AT2G37690.1		pollen development
GH_D03G0313	18.5724	16.8958	30.2797	9.17957	15.5357	AT4G37880.1		proteasome-mediated ubiquitin-dependent protein catabolic process
GH_D12G0985	8.01277	12.1894	3.94148	12.9261	7.28823	AT3G60240.4	EIF4G	Response to virus
GH_D12G0963	3.98751	5.58854	3.88781	11.5359	3.5426	AT2G44810.2	DAD1	anther dehiscence, jasmonic acid biosynthetic process, pollen maturation, positive regulation of cell death, response to wounding
GH_D13G1351	14.8219	16.7933	6.58546	21.3039	16.834	AT1G55730.2	CAX5	calcium ion transmembrane transport, cellular calcium ion homeostasis
GH_D12G0970	10.1661	3.26605	7.99277	5.23725	6.80044	AT2G44760.1		chlorophyll biosynthetic process, response to light stimulus, seed development
GH_A11G2246	19.5307	19.1074	27.7592	10.4217	32.4373	AT3G62380.1		regulation of transcription, DNA-templated
GH_A11G2269	4.78346	2.77497	6.1718	8.63104	3.97622	AT1G08750.3	GPI8	stomatal complex patterning; attachment of GPI anchor to protein, protein localization to cell surface
GH_A11G2250	2.8939	2.19991	0.945439	1.22291	1.36136	AT2G30580.2	DRIP2	response to water deprivation; protein autoubiquitination, protein ubiquitination
GH_A05G3186	4.22847	4.18104	6.53231	2.91032	2.13946	AT2G03340.1	WRKY3	regulation of transcription, DNA-templated, response to salt stress
GH_D12G0956	1.85332	3.21778	2.38113	5.56875	3.17103	AT2G44900.2	ARABIDILLO-1	lateral root development
GH_D03G0326	10.2028	8.98305	5.2616	4.635	3.42729	AT4G37980.1	EILI3-1	green leaf volatile biosynthetic process, plant-type hypersensitive response, response to bacterium; lignin biosynthetic process
GH_D12G0955	28.1465	33.2058	11.325	22.9616	27.2563	AT4G28050.1	TET7	auxin-activated signaling pathway
GH_D05G3179	2.98702	2.79596	3.54763	1.7505	1.23925	AT1G53700.1	WAG1	auxin polar transport, cotyledon development, root development; protein phosphorylation; gravitropism
GH_A05G3209	6.14348	6.64115	4.17498	2.3804	2.67895	AT5G15530.1	BCCP2	carbohydrate derivative metabolic process, fatty acid biosynthetic process, response to inorganic substance, sulfur compound metabolic process; fatty acid biosynthetic process
GH_A05G3199	4.16023	3.28341	4.24416	9.14586	8.02162	AT5G39380.5		developmental growth
GH_A11G2267	16.1681	19.7013	9.89473	26.8315	14.3964	AT5G28640.1	AN3	cell division, leaf development, regulation of gene expression; adaxial/abaxial pattern specification, cell population proliferation, cotyledon development, leaf development, positive regulation of transcription by RNA polymerase II
GH_D13G1328	1.82864	1.13202	2.40076	2.94834	2.26584	AT1G79380.1	RGLG4	defense response to bacterium, jasmonic acid mediated signaling pathway, response to wounding; protein K63-linked ubiquitination
GH_D03G0328	60.7862	50.566	35.2762	90.3691	34.8215	AT4G38040.1		protein glycosylation
GH_D03G0322	14.4066	37.3479	20.833	21.2845	29.1837	AT5G10530.1	LECRK-IX.1	defense response to bacterium, defense response to oomycetes, positive regulation of cell death, positive regulation of hydrogen peroxide metabolic process, protein phosphorylation
GH_A08G0534	12.9326	21.7497	18.5221	18.0245	8.41237	AT2G44810.2	DAD1	anther dehiscence, jasmonic acid biosynthetic process, pollen maturation, positive regulation of cell death, response to wounding
GH_D05G3180	9.14927	4.26007	6.36373	3.73593	3.61002	AT3G12890.1	ASML2	positive regulation of transcription, DNA-templated, sugar mediated signaling pathway
GH_D03G0307	17.5104	33.7576	23.5551	19.0211	13.4612	AT5G65685.12	SS5	starch granule initiation; starch biosynthetic process
GH_D05G3191	27.3793	16.594	30.5097	29.9213	40.8854	AT1G79420.1	BDR2	anatomical structure arrangement, cell wall polysaccharide biosynthetic process, chromosome organization, leaf development, meristem development, plant organ morphogenesis, plant-type cell wall biogenesis, plant-type secondary cell wall biogenesis, regionalization, seed development, shoot system morphogenesis
GH_D13G1348	5.12007	4.74411	2.58065	5.1898	2.12511	AT5G23810.1	AAP7	amino acid transport, oxoacid metabolic process, response to abscisic acid, response to water deprivation
GH_D12G0953	19.917	48.4289	22.1681	39.6534	33.7196	AT3G60390.1	HAT3	response to hypoxia
GH_D12G0964	3.73474	3.24603	1.99815	1.54561	2.77094	AT2G44810.2	DAD1	anther dehiscence, jasmonic acid biosynthetic process, pollen maturation, positive regulation of cell death, response to wounding
GH_D02G1503	5.71514	4.38326	7.4159	4.45608	3.07042	AT1G27290.2		hormone-mediated signaling pathway, response to abscisic acid, response to nitrogen compound, response to organonitrogen compound, response to water, signal transduction
GH_D12G0973	2.68589	3.76691	2.51645	3.21237	1.57906	AT5G51160.1		cellular catabolic process, chemical homeostasis, defense response to bacterium, inorganic anion transport, response to toxic substance, secondary metabolic process
GH_A05G3214	4.24609	1.99673	4.67806	4.03824	3.97353	AT3G02100.1		root development
GH_A08G0544	75.8442	40.0653	89.6039	63.1245	92.6654	AT2G44900.2	ARABIDILLO-1	lateral root development
GH_A08G0529	57.0815	105.686	71.3872	46.1154	66.4213	AT1G02140.1	MAGO	embryo development ending in seed dormancy, pollen tube guidance, positive regulation of gene expression
GH_A08G0516	1.44193	1.22635	1.22086	1.91073	2.79195	AT5G23740.1	RPS11-BETA	translation
GH_A05G3205	4.82777	2.13062	3.11877	2.14955	2.54284	AT2G45120.1	ZAT4	regulation of transcription, DNA-templated
GH_D03G0342	16.9571	24.8872	38.3944	28.867	25.8632	AT4G39780.1		defense response, response to light stimulus; regulation of transcription, DNA-templated
GH_D13G1339	7.58753	7.40131	9.65467	6.1651	4.30855	AT4G26450.2		flower development, negative regulation of transcription, DNA-templated, organelle organization, regulation of developmental process, regulation of gene expression, epigenetic, vegetative to reproductive phase transition of meristem
GH_D03G0339	4.34724	3.03652	5.62152	3.54824	2.51139	AT5G10490.2	MSL2	chloroplast fission, plastid organization; transmembrane transport
GH_D03G0327	18.0915	39.6051	21.3375	29.4017	25.9843	AT5G65590.1	SCAP1	guard cell differentiation, positive regulation of transcription, DNA-templated, regulation of cell wall pectin metabolic process, regulation of transcription, DNA-templated, stomatal movement
GH_A05G3218	28.707	17.1599	35.6412	18.2547	36.5863	AT1G78080.1	RAP2.4	cellular response to salt stress, cytokinin-activated signaling pathway, ethylene-activated signaling pathway, red or far-red light signaling pathway, regulation of cell differentiation, response to cold, response to heat, response to light stimulus, response to osmotic stress, response to salt stress, response to water deprivation, response to wounding
GH_A08G0524	7.52305	4.55942	5.16352	3.55339	3.54513	AT2G44740.1	CYCP4;1	regulation of cyclin-dependent protein serine/threonine kinase activity
GH_D02G1482	12.5498	12.5151	10.9947	15.1875	7.16683	AT5G47690.4	PDS5A	DNA repair, microsporogenesis; DNA recombination, DNA repair, homologous recombination, mitotic sister chromatid cohesion
GH_A05G3210	29.7508	17.326	28.7945	19.5834	36.5822	AT5G39280.1	EXPA23	plant-type cell wall loosening, unidimensional cell growth
GH_D03G0317	9.07066	8.84874	7.22262	13.8777	6.57454	AT5G65640.1	bHLH093	gibberellin catabolic process, regulation of gibberellin biosynthetic process; regulation of transcription, DNA-templated
GH_D03G0331	12.3857	5.8823	7.85954	9.20584	8.99452	AT5G10510.6	AIL6	auxin mediated signaling pathway involved in phyllotactic patterning, callus formation, flower development, lateral root formation, leaf phyllotactic patterning, maintenance of shoot apical meristem identity, organ growth, phyllotactic patterning, plant organ morphogenesis, regulation of floral meristem growth, regulation of transcription, DNA-templated, root development
GH_D12G0978	11.581	8.01635	7.76829	15.5815	7.44391	AT5G51160.1		cellular catabolic process, chemical homeostasis, defense response to bacterium, inorganic anion transport, response to toxic substance, secondary metabolic process
GH_D12G0934	18.273	20.4646	28.8758	15.8208	32.909	AT4G00150.1	HAM3	cell differentiation, cell division, circadian rhythm, regulation of transcription, DNA-templated, root hair cell tip growth; regulation of transcription, DNA-templated
GH_A11G2251	10.8085	6.32334	7.18845	6.89842	5.24782	AT1G55190.1	PRA7	vesicle-mediated transport
GH_D12G0962	6.79031	4.50783	3.49138	3.29897	4.68192	AT1G02120.1	VAD1	defense response to bacterium, negative regulation of programmed cell death; defense response to bacterium, negative regulation of programmed cell death, response to ethylene, response to salicylic acid
GH_A05G3197	5.3883	4.5514	6.01194	2.93144	3.75607	AT5G45480.1		defense response to other organism, response to jasmonic acid, response to organic cyclic compound, response to wounding, small molecule metabolic process
GH_D03G0323	65.3043	72.7214	88.4689	105.091	131.647	AT2G22620.3	RGIL6	response to abscisic acid; carbohydrate metabolic process
GH_A08G0531	5.24591	9.0949	6.8228	6.04724	4.54238	AT1G02130.1	RA-5	endoplasmic reticulum to Golgi vesicle-mediated transport

## Sheet: Table S7
Table S7 A list of genes might be involved in fiber elongation
Gene	Fiber			Homologue	Other names	Gene annotation
	5dpa	10dpa	20dpa
GH_A05G3173	0.621525	0	2.93598	AT1G55530.2	BTL06	protein ubiquitination
GH_D03G0313	10.712	11.8484	0	AT4G37880.1		proteasome-mediated ubiquitin-dependent protein catabolic process
GH_D02G1489	8.35195	8.29946	0	AT5G14090.1	LAZY1	gravitropism, regulation of auxin polar transport
GH_D03G0306	0	0.104483	5.75976	AT2G22730.3		transmembrane transport
GH_A08G0521	0.410135	5.10092	0	AT1G28710.4		flower development
GH_A08G0537	2.62241	3.73358	0	AT2G44840.1	ERF13	ethylene-activated signaling pathway; regulation of transcription, DNA-templated
GH_A05G3182	0	0.096708	3.51166	AT1G26690.1		Golgi organization, endoplasmic reticulum to Golgi vesicle-mediated transport, intracellular protein transport
GH_A11G2270	0	0	2.53553	AT3G50120.1		cell morphogenesis involved in differentiation, cell tip growth, cellular polysaccharide metabolic process, developmental cell growth, plant epidermis development, root development
GH_D03G0305	0.067616	0	2.2838	AT4G37850.2		regulation of transcription, DNA-templated
GH_A11G2238	0	2.02297	0.775263	AT1G08620.3	PKDM7D	regulation of transcription, DNA-templated; chromatin remodeling
GH_D12G0983	0.068972	0.02472	26.9263	AT4G17080.1		defense response to other organism
GH_D13G1352	0.812981	12.5981	434.788	AT5G56100.1		lipid storage
GH_A08G0515	2.19236	1.55548	415.559	AT3G60220.1	ATL4	protein ubiquitination
GH_D05G3205	0.189994	1.59041	25.6543	AT1G71130.1	CRF8	carbohydrate derivative metabolic process, cellular lipid metabolic process, lipid biosynthetic process, phosphate-containing compound metabolic process, response to abscisic acid, response to temperature stimulus, response to water deprivation
GH_D13G1341	1.55302	4.82507	140.699	AT4G26455.1	WIP1	nucleus organization
GH_D03G0345	0.489723	3.46931	0.07385	AT2G22170.1	PLAT2	carboxylic acid metabolic process, cell division, defense response to other organism, developmental growth, plant epidermis development, plant-type cell wall biogenesis, response to lipid, response to organic cyclic compound, response to oxidative stress, response to wounding, root morphogenesis
GH_D03G0307	8.34613	3.17688	0.498031	AT5G65685.12	SS5	starch granule initiation; starch biosynthetic process
GH_A11G2266	0.217246	0.244727	3.51505	AT2G37690.1		pollen development
GH_A11G2261	0.62994	0.153558	2.14079	AT1G54460.1		microtubule cytoskeleton organization
GH_D03G0340	4.92338	0.985883	0.447375	AT5G65470.1		defense response to other organism, growth, plant-type cell wall biogenesis, regulation of defense response, secondary metabolic process, signal transduction
GH_D12G0955	3.33502	10.4888	36.1301	AT4G28050.1	TET7	auxin-activated signaling pathway
GH_D12G0953	13.9854	11.5296	115.467	AT3G60390.1	HAT3	response to hypoxia
GH_D12G0954	0.627468	0.343329	3.27683	AT4G01710.1	CRK	actin cytoskeleton organization, actin filament organization, actin filament polymerization, multidimensional cell growth, trichome morphogenesis; Arp2/3 complex-mediated actin nucleation, regulation of actin filament polymerization
GH_D02G1499	7.68008	47.5781	64.1521	AT5G50670.2	SPL13B	anther development
GH_D03G0337	4.18677	0.99626	7.42072	AT2G22560.1	NET2D	plant epidermis development, plant-type cell wall organization or biogenesis, response to water deprivation
GH_D12G0956	1.9847	1.6698	12.4183	AT2G44900.2	ARABIDILLO-1	lateral root development
GH_D03G0328	18.1901	9.20873	2.6621	AT4G38040.1		protein glycosylation
GH_A05G3207	2.94599	2.76438	0.45914	AT5G15510.4	TPXL5	activation of protein kinase activity, mitotic spindle assembly, regulation of mitotic spindle organization
GH_D12G0937	11.9895	1.93723	6.93004	AT2G45130.1	SPX3	cellular response to phosphate starvation, positive regulation of cellular response to phosphate starvation
GH_D12G0961	0.757106	4.39111	2.59942	AT1G02090.1	FUS5	COP9 signalosome assembly, photomorphogenesis, protein deneddylation
GH_D05G3200	2.04722	0.929502	0.37108	AT3G12930.1	DG238	negative regulation of ribosome biogenesis, negative regulation of translation
GH_A11G2241	1.32639	0.588351	2.96995	AT3G04730.1	IAA16	response to auxin; regulation of transcription, DNA-templated
GH_A11G2240	10.4294	5.63969	28.4582	AT1G09770.1	CDC5	defense response to bacterium, defense response to fungus, regulation of transcription, DNA-templated
GH_A08G0520	7.22128	3.77021	18.7808	AT2G44690.1	ARAC9	actin filament organization, autophagy, cortical cytoskeleton organization, establishment or maintenance of cell polarity, regulation of actin cytoskeleton organization, regulation of cell shape, small GTPase mediated signal transduction
GH_A08G0545	2.5784	2.25008	10.8687	AT3G60370.1		photosystem II assembly
GH_A05G3211	2.41504	2.79002	0.591777	AT5G39280.1	EXPA23	plant-type cell wall loosening, unidimensional cell growth
GH_D05G3199	22.9409	13.5368	4.90077	AT1G18870.1	ICS2	biosynthetic process, phylloquinone biosynthetic process, salicylic acid biosynthetic process
GH_D13G1337	21.631	7.61358	4.70557	AT3G12700.1	NANA	carbohydrate metabolic process, chloroplast-nucleus signaling pathway; circadian rhythm, response to sucrose
GH_D12G0985	4.65638	5.75091	21.0881	AT3G60240.4	EIF4G	Response to virus
GH_D03G0342	17.3237	11.5816	49.2378	AT4G39780.1		defense response, response to light stimulus; regulation of transcription, DNA-templated
GH_A05G3176	28.7884	19.9715	6.80111	AT3G59650.1		mitochondrial translation; cellular component biogenesis
GH_A05G3199	8.02442	31.8572	22.001	AT5G39380.5		developmental growth
GH_A11G2263	2.42069	0.611555	1.94206	AT3G04610.4	FLK	positive regulation of flower development; regulation of gene expression
GH_A11G2267	8.28712	5.55808	21.6899	AT5G28640.1	AN3	cell division, leaf development, regulation of gene expression; adaxial/abaxial pattern specification, cell population proliferation, cotyledon development, leaf development, positive regulation of transcription by RNA polymerase II
GH_D12G0965	24.3988	35.3336	9.0773	AT3G60300.1		response to light stimulus; protein ubiquitination
GH_A05G3205	2.65825	2.19102	8.50437	AT2G45120.1	ZAT4	regulation of transcription, DNA-templated
GH_A05G3201	37.552	119.627	31.9413	AT5G15450.1	CLPB3	chloroplast organization, response to heat; cellular response to heat, protein refolding
GH_A08G0516	10.5035	9.1862	2.90115	AT5G23740.1	RPS11-BETA	translation
GH_D13G1339	2.19394	0.660581	2.34959	AT4G26450.2		flower development, negative regulation of transcription, DNA-templated, organelle organization, regulation of developmental process, regulation of gene expression, epigenetic, vegetative to reproductive phase transition of meristem
GH_D03G0308	0.966616	3.42784	1.21267	AT2G22720.6		regulation of reproductive process; histone exchange, nucleosome assembly, regulation of chromatin assembly, regulation of transcription, DNA-templated
GH_D13G1328	2.13002	1.04463	3.70214	AT1G79380.1	RGLG4	defense response to bacterium, jasmonic acid mediated signaling pathway, response to wounding; protein K63-linked ubiquitination
GH_A05G3192	6.61228	1.93319	5.88485	AT4G21300.1	ATDEK36	RNA modification
GH_D03G0318	4.04251	4.92737	1.46698	AT5G05800.5		negative regulation of metabolic process
GH_A05G3200	6.35094	2.80797	9.39202	AT5G39360.1	EDL2	cellular response to organic cyclic compound, cellular response to organic substance, cellular response to oxygen-containing compound, defense response to other organism, protein phosphorylation, signal transduction
GH_A08G0523	5.3823	3.84145	12.683	AT5G51160.1		cellular catabolic process, chemical homeostasis, defense response to bacterium, inorganic anion transport, response to toxic substance, secondary metabolic process
GH_D02G1487	9.15748	5.51074	2.93276	AT1G20180.1		leaf senescence, response to osmotic stress
GH_A05G3181	5.53311	4.93253	14.761	AT3G29060.1		cellular response to phosphate starvation, phosphate ion transport
GH_A08G0529	46.9806	133.546	139.79	AT1G02140.1	MAGO	embryo development ending in seed dormancy, pollen tube guidance, positive regulation of gene expression
GH_A11G2265	1.82872	1.53908	4.5401	AT2G37690.1		pollen development
GH_A05G3209	0.871966	2.53454	1.85001	AT5G15530.1	BCCP2	carbohydrate derivative metabolic process, fatty acid biosynthetic process, response to inorganic substance, sulfur compound metabolic process; fatty acid biosynthetic process
GH_A08G0518	12.8836	6.40092	4.54156	AT2G44670.1		response to starvation
GH_D12G0970	6.15814	2.25378	5.11793	AT2G44760.1		chlorophyll biosynthetic process, response to light stimulus, seed development
GH_A11G2264	22.7842	14.5858	8.56153	AT1G08800.4	MYOB1	response to abscisic acid
GH_D03G0327	20.43	18.6109	48.5354	AT5G65590.1	SCAP1	guard cell differentiation, positive regulation of transcription, DNA-templated, regulation of cell wall pectin metabolic process, regulation of transcription, DNA-templated, stomatal movement
GH_A08G0534	2.3041	0.935096	2.40784	AT2G44810.2	DAD1	anther dehiscence, jasmonic acid biosynthetic process, pollen maturation, positive regulation of cell death, response to wounding
GH_A08G0514	2.49501	4.02105	6.34857	AT2G44620.1	MTACP1	fatty acid biosynthetic process, mitochondrial electron transport, NADH to ubiquinone; fatty acid biosynthetic process
GH_D02G1501	11.8443	7.65823	4.70168	ATCG00710.1	PSBH	photosynthesis, light harvesting in photosystem II; protein stabilization
GH_D03G0311	2.07729	1.39999	3.51508	AT4G37870.1	PCK1	cellular response to phosphate starvation; gluconeogenesis
GH_D02G1493	6.74509	2.99189	7.47467	AT5G13080.1	WRKY75	atrichoblast differentiation, lateral root development, negative regulation of transcription by RNA polymerase II, regulation of DNA-templated transcription in response to stress, regulation of response to nutrient levels
GH_D05G3204	6.49767	6.17701	15.2114	AT1G79120.2		cellular component biogenesis
GH_A05G3218	46.2054	27.6163	19.1244	AT1G78080.1	RAP2.4	cellular response to salt stress, cytokinin-activated signaling pathway, ethylene-activated signaling pathway, red or far-red light signaling pathway, regulation of cell differentiation, response to cold, response to heat, response to light stimulus, response to osmotic stress, response to salt stress, response to water deprivation, response to wounding
GH_A11G2242	2.96322	1.22751	2.71914	AT5G43700.1	ATAUX2-11	response to auxin;regulation of transcription, DNA-templated
GH_D02G1490	29.2585	21.8334	12.5035	AT5G41980.1		flower development
GH_D03G0344	14.1474	19.1351	8.24808	AT2G22180.1		regulation of developmental process
GH_A08G0517	9.68536	5.09649	11.8213	AT5G47030.1		proton motive force-driven ATP synthesis
GH_A08G0526	69.3086	116.387	159.571	AT2G44745.1	WRKY12	plant-type cell wall biogenesis, regulation of transcription, DNA-templated, shoot system development; regulation of transcription, DNA-templated
GH_A05G3197	1.66291	3.15439	3.817	AT5G45480.1		defense response to other organism, response to jasmonic acid, response to organic cyclic compound, response to wounding, small molecule metabolic process
GH_A08G0542	6.52089	3.74657	8.55148	AT2G44850.3		cellular localization
GH_A08G0532	25.6619	11.5293	12.4522	AT4G18975.2		response to light stimulus, terpenoid metabolic process
GH_D12G0966	3.58593	1.97664	4.34912	AT2G44800.1		cellular response to hypoxia
GH_A11G2246	27.1933	39.5986	18.0896	AT3G62380.1		regulation of transcription, DNA-templated
GH_D05G3180	4.05401	1.9142	4.10994	AT3G12890.1	ASML2	positive regulation of transcription, DNA-templated, sugar mediated signaling pathway
GH_D03G0351	4.60351	4.64519	9.67099	AT5G10250.2	DOT3	cotyledon vascular tissue pattern formation, leaf vascular tissue pattern formation, phloem or xylem histogenesis, primary root development, shoot system development; protein ubiquitination
GH_D03G0338	28.5452	13.6608	27.4185	AT4G38060.4	CCI2	aging, response to wounding
GH_A08G0543	3.51595	2.47233	5.04941	AT2G44880.6	AHG11	RNA modification
GH_A11G2249	5.76751	3.25104	6.60364	AT2G30570.1	PSBW	photosystem II stabilization

## Sheet: Table S8
Table S8 The gens/candidate genes reported for lint percentage
Gene ID	Gene Name	Chromosome	Homologous gene	Description	function	References
Gh_A02G1268	MIPS	A02	At2g22240	the myo-inositol-1-phosphate synthase (MIPS) gene family		Su et al., 2016
Gh_A10G0378		A02		be related to potassium ion transport		Xing er al. 2019
Gh_D03G1419	MYB103	D3		affect callose dissolution during the anther development in Arabidopsis		Zhu et al., 2020
Gh_D08G2376	UGT80A2	D08	AT3G07020			Huang et al., 2017
GH_D06G2161	asnS	D06	AT5G32440	a ubiquitin system component cue protein mRNA	belonged to the class-II aminoacyl-tRNA synthetase family	Su et al., 2020
GH_A08G0716	NET	A08		encoding kinases interacting (KIP1-like) family protein		Zhu et al., 2021
GH_A08G0783	NET	A08		encoding kinases interacting (KIP1-like) family protein		Zhu et al., 2021
Gh_D05G0313	LUT2	D05	AtLUT2	play an important role in photosynthesis		Song et al. 2019
Gh_D05G1124	PP2C	D05	AtPP2C	be involved in protein phosphorylation		Song et al. 2019
Gh_A02G1269	ATJ20	A02	AT4G13830	a key regulator of isopentenyl diphosphate biosynthetic process		Su et al. 2019
Gh_A02G1280		A02				Su et al. 2019
Gh_A02G1295	CYP78A5	A02	AT5G09970	a cytochrome P450 gene involved in multicellular organism development, oxidation-reduction process, regulation of growth, and regulation of meristem growth		Su et al. 2019
Gh_A02G1278	RHA2A	A02	AT1G15100	involved in the positive regulation of abscisic acid (ABA) signaling		Su et al. 2019
Gh_D03G1064	FRI	D03		a major determinant of natural variation in fowering time		Sun et al. 2018
Gh_D12G2354	GPR107	D12		might be one of the receptors that associates with G proteins at the Golgi to regulate intracellular vesicular transport		Sun et al. 2018
Gh_D08G0312	EIL	D08		ethylene insensitive 3-like family protein		Fang et al. 2017
Gh_D02G0025		D02	AT2G37230	Pentatricopeptide repeat-containing protein At2g37230		Ma et al. 2018
Gh_D01G0162	GH3.5	D01		be involved in various developmental processes and environmental responses in plants		Chen et al. 2022
Gh_D07G0463	RBOHD	D07		involved in root growth		Chen et al. 2022
Ghir_A03G020290		A03		a thioredoxin domain-containing protein 9 homologue		Gu et al. 2020
MYB4	MYB4	D13		Preferential expression during cotton fiber development		Zhu et al. 2020
Gh_D03G0919	GhCOBL4	D03		be involved in secondary cell wall synthesis		Wang et al. 2020
Gh_D09G1659	GhMYB4	D09		negatively regulates lignin synthesis		Wang et al. 2020
Gh_D09G1690	GhMYB85	D09		positively regulates lignin synthesis		Wang et al. 2020
Gh_A05G1584	FREE1	A05	AT1G20110	the key regulator of intracellular trafficking and vacuole biogenesis and plays an essential role in plant growth and development		Wang et al. 2021
Gh_A05G1689	TLP3	A05	AT1G75030	a member of the thaumatin-like protein family and encodes a pathogenesis related 5-like protein		Wang et al. 2021
GH_D09G1314	GhPAP16	D09				Wang et al. 2022
GH_D09G1315	GhIQD14	D09		plays a crucial role in cellulose deposition into cell walls		Wang et al. 2022
GH_D01G0052	TMN1	D01		mediators of the cellular content of metals (Cu and Mg, respectively) and being involved in plant cell development		Gao et al. 2021
GH_D01G0099		D01	AT1G47530	a turgor-regulating chloride channel, it is involved in various plant life activities		Gao et al. 2021
GH_D01G0100	PMT5	D01	AT3G18830	be involved in plant cell wall modifications		Gao et al. 2021
GH_D01G0140		D01				Gao et al. 2021
iaaM					increased IAA levels in the epidermis of cotton ovules at the fiber initiation stage, resulting in the number of lint fibers increased and lint percentage higher	Zhang et al. 2011
GB_A07G1034	HERK 1	A07	AT3G46290	a receptor kinase regulated by brassinosteroids and required for cell elongation during vegetative growth		Yu et al. 2021
Gh_D02G0201	GhWAKL3	D02	AT1G69730			Ma et al. 2019
Gbar_A05G014160	DEAH12	A05		contained a RING-type zinc-finger domain, a characteristic of the E3 ubiquitin ligase RBR family		Zhao et al. 2022
GhHD-1					over-expressed GhHD-1 produced higher lint percentage	Liu et al. 2020
GhMYB25					GhMYB25 over-expressing T lines on average had a lower lint percentage	Liu et al. 2020; Zhu et al. 2018
GhMYB25-Like					over-expressing GhMYB25L generally had higher lint percentage	Liu et al. 2020
213047556	GhLac1				modulates fiber initiation and elongation by coordinating jasmonic acid and flavonoid metabolism, but did not change lint percentage	Hu et al. 2020
Gh_A13G0332	GhAATF1	A13	AT5G61330	play important roles in the regulation of gene transcription and cell proliferation		Han et al. 2020
Gh_A13G0336	GhmTERF1	A13	AT2G21710	be related to seedling growth and embryo development		Han et al. 2020
Ghir_D02G018120	GhGRAM31	D02			lint percentage was decreased in the RNAi lines	Ye et al. 2021
Gh_A05G1167	GhMYB3	A05			Overexpression of GhMYB3 leads to lint percentage increasing, possibly by activating the transcription of its downstream gene GhRDL1 or other fibre-related genes	Shangguan et al. 2021
Gh_A08G0687	GhUXS2	A08		UDP-glucuronic acid decarboxylase 2 gene		Zhang et al. 2019
DR459544	GhH2A12				Overexpression of GhH2A12 caused retardation of fiber initiation and produced shorter fibers and lower lint percentages.	Hao et al. 2014
DQ912946	GbPDF1				PDF1 silencing caused lower lint percentage	Deng et al. 2012
DQ912941	GbTCP				RNAi silencing of GbTCP produced a reduced lint percentage	Hao et al. 2012

## Sheet: Table S9
Table S9 Prediction of Gh_A08G0526 interactions
Node1	Node2	Node1 accession	Node2 accession	Node1 annotation	Node2 annotation	Score
MYB46	NAC012	AT5G12870.1	AT1G32770.1	Transcription factor myb, plant; Transcription factor MYB46; Transcription activator. Involved in the regulation of secondary wall biosynthesis in fibers and vessels. Transcription activator of the mannan synthase CSLA9 that recognizes and binds to the DNA consensus sequence 5'- [AG][GT]T[AT]GGT[GA]-3' cis-regulatory element of CSLA9 promoter. Transcription factor that acts as molecular switch in…	Nac secondary wall thickening promoting 3; NAC domain containing protein 12; Transcriptional activator of genes involved in biosynthesis of secondary walls. Together with NST1, required for the secondary cell wall thickening and lignification of sclerenchymatous fibers and secondary xylem vessels (tracheary elements). Seems to repress the secondary cell wall thickening of xylary fibers. May also …	0.961
MYB46	NAC066	AT5G12870.1	AT3G61910.1	Transcription factor myb, plant; Transcription factor MYB46; Transcription activator. Involved in the regulation of secondary wall biosynthesis in fibers and vessels. Transcription activator of the mannan synthase CSLA9 that recognizes and binds to the DNA consensus sequence 5'- [AG][GT]T[AT]GGT[GA]-3' cis-regulatory element of CSLA9 promoter. Transcription factor that acts as molecular switch in…	Nac secondary wall thickening promoting factor2; NAC domain-containing protein 66; Transcription activator of genes involved in biosynthesis of secondary walls. Together with NST1, required for the secondary cell wall thickening of the anther endocethium, which is necessary for anther dehiscence. May also regulate the secondary cell wall lignification of other tissues such as tracheary elements	0.913
MYB46	NST1	AT5G12870.1	AT2G46770.1	Transcription factor myb, plant; Transcription factor MYB46; Transcription activator. Involved in the regulation of secondary wall biosynthesis in fibers and vessels. Transcription activator of the mannan synthase CSLA9 that recognizes and binds to the DNA consensus sequence 5'- [AG][GT]T[AT]GGT[GA]-3' cis-regulatory element of CSLA9 promoter. Transcription factor that acts as molecular switch in…	NAC (No Apical Meristem) domain transcriptional regulator superfamily protein; Transcription activator of genes involved in biosynthesis of secondary walls. Together with NST2 and NST3, required for the secondary cell wall thickening of sclerenchymatous fibers, secondary xylem (tracheary elements), and of the anther endocethium, which is necessary for anther dehiscence. May also regulate the seco…	0.942
MYB46	VND7	AT5G12870.1	AT1G71930.1	Transcription factor myb, plant; Transcription factor MYB46; Transcription activator. Involved in the regulation of secondary wall biosynthesis in fibers and vessels. Transcription activator of the mannan synthase CSLA9 that recognizes and binds to the DNA consensus sequence 5'- [AG][GT]T[AT]GGT[GA]-3' cis-regulatory element of CSLA9 promoter. Transcription factor that acts as molecular switch in…	Arabidopsis nac domain containing protein 30; Transcription activator that binds to the secondary wall NAC binding element (SNBE), 5'- (T/A)NN(C/T)(T/C/G)TNNNNNNNA(A/C)GN(A/C/T)(A/T)-3', in the promoter of target genes (e.g. genes involved in secondary wall biosynthesis, cell wall modification such as xylan accumulation, and programmed cell death) Involved in xylem formation in roots and shoots, …	0.939
MYB46	WRKY12	AT5G12870.1	AT2G44745.1	Transcription factor myb, plant; Transcription factor MYB46; Transcription activator. Involved in the regulation of secondary wall biosynthesis in fibers and vessels. Transcription activator of the mannan synthase CSLA9 that recognizes and binds to the DNA consensus sequence 5'- [AG][GT]T[AT]GGT[GA]-3' cis-regulatory element of CSLA9 promoter. Transcription factor that acts as molecular switch in…	Probable WRKY transcription factor 12; Transcription factor. Interacts specifically with the W box (5'-(T)TGAC[CT]-3'), a frequently occurring elicitor- responsive cis-acting element (By similarity)	0.638
MYB63	NAC012	AT1G79180.1	AT1G32770.1	Transcription factor myb, plant; Transcriptional activator that binds DNA to the AC cis- elements 5'-ACCTACC-3', 5'-ACCAACC-3' and 5'-ACCTAAC-3' of promoters and specifically activates lignin biosynthetic genes during secondary wall formation mediated by SND1	Nac secondary wall thickening promoting 3; NAC domain containing protein 12; Transcriptional activator of genes involved in biosynthesis of secondary walls. Together with NST1, required for the secondary cell wall thickening and lignification of sclerenchymatous fibers and secondary xylem vessels (tracheary elements). Seems to repress the secondary cell wall thickening of xylary fibers. May also …	0.918
MYB63	NAC066	AT1G79180.1	AT3G61910.1	Transcription factor myb, plant; Transcriptional activator that binds DNA to the AC cis- elements 5'-ACCTACC-3', 5'-ACCAACC-3' and 5'-ACCTAAC-3' of promoters and specifically activates lignin biosynthetic genes during secondary wall formation mediated by SND1	Nac secondary wall thickening promoting factor2; NAC domain-containing protein 66; Transcription activator of genes involved in biosynthesis of secondary walls. Together with NST1, required for the secondary cell wall thickening of the anther endocethium, which is necessary for anther dehiscence. May also regulate the secondary cell wall lignification of other tissues such as tracheary elements	0.848
MYB63	NST1	AT1G79180.1	AT2G46770.1	Transcription factor myb, plant; Transcriptional activator that binds DNA to the AC cis- elements 5'-ACCTACC-3', 5'-ACCAACC-3' and 5'-ACCTAAC-3' of promoters and specifically activates lignin biosynthetic genes during secondary wall formation mediated by SND1	NAC (No Apical Meristem) domain transcriptional regulator superfamily protein; Transcription activator of genes involved in biosynthesis of secondary walls. Together with NST2 and NST3, required for the secondary cell wall thickening of sclerenchymatous fibers, secondary xylem (tracheary elements), and of the anther endocethium, which is necessary for anther dehiscence. May also regulate the seco…	0.853
MYB63	VND7	AT1G79180.1	AT1G71930.1	Transcription factor myb, plant; Transcriptional activator that binds DNA to the AC cis- elements 5'-ACCTACC-3', 5'-ACCAACC-3' and 5'-ACCTAAC-3' of promoters and specifically activates lignin biosynthetic genes during secondary wall formation mediated by SND1	Arabidopsis nac domain containing protein 30; Transcription activator that binds to the secondary wall NAC binding element (SNBE), 5'- (T/A)NN(C/T)(T/C/G)TNNNNNNNA(A/C)GN(A/C/T)(A/T)-3', in the promoter of target genes (e.g. genes involved in secondary wall biosynthesis, cell wall modification such as xylan accumulation, and programmed cell death) Involved in xylem formation in roots and shoots, …	0.809
MYB63	WRKY12	AT1G79180.1	AT2G44745.1	Transcription factor myb, plant; Transcriptional activator that binds DNA to the AC cis- elements 5'-ACCTACC-3', 5'-ACCAACC-3' and 5'-ACCTAAC-3' of promoters and specifically activates lignin biosynthetic genes during secondary wall formation mediated by SND1	Probable WRKY transcription factor 12; Transcription factor. Interacts specifically with the W box (5'-(T)TGAC[CT]-3'), a frequently occurring elicitor- responsive cis-acting element (By similarity)	0.61
MYB83	NAC012	AT3G08500.1	AT1G32770.1	Transcription factor myb, plant; Transcription factor that acts as molecular switch in the NAC012/SND1-mediated transcriptional network regulating secondary wall biosynthesis. Is directly activated by NAC012/SND1 and its close homologs, including NAC043/NST1, NAC066/NST2, NAC101/VND6 and NAC030/VND7. Is required for functional expression of a number of secondary wall-associated transcription fact…	Nac secondary wall thickening promoting 3; NAC domain containing protein 12; Transcriptional activator of genes involved in biosynthesis of secondary walls. Together with NST1, required for the secondary cell wall thickening and lignification of sclerenchymatous fibers and secondary xylem vessels (tracheary elements). Seems to repress the secondary cell wall thickening of xylary fibers. May also …	0.954
MYB83	NAC066	AT3G08500.1	AT3G61910.1	Transcription factor myb, plant; Transcription factor that acts as molecular switch in the NAC012/SND1-mediated transcriptional network regulating secondary wall biosynthesis. Is directly activated by NAC012/SND1 and its close homologs, including NAC043/NST1, NAC066/NST2, NAC101/VND6 and NAC030/VND7. Is required for functional expression of a number of secondary wall-associated transcription fact…	Nac secondary wall thickening promoting factor2; NAC domain-containing protein 66; Transcription activator of genes involved in biosynthesis of secondary walls. Together with NST1, required for the secondary cell wall thickening of the anther endocethium, which is necessary for anther dehiscence. May also regulate the secondary cell wall lignification of other tissues such as tracheary elements	0.903
MYB83	NST1	AT3G08500.1	AT2G46770.1	Transcription factor myb, plant; Transcription factor that acts as molecular switch in the NAC012/SND1-mediated transcriptional network regulating secondary wall biosynthesis. Is directly activated by NAC012/SND1 and its close homologs, including NAC043/NST1, NAC066/NST2, NAC101/VND6 and NAC030/VND7. Is required for functional expression of a number of secondary wall-associated transcription fact…	NAC (No Apical Meristem) domain transcriptional regulator superfamily protein; Transcription activator of genes involved in biosynthesis of secondary walls. Together with NST2 and NST3, required for the secondary cell wall thickening of sclerenchymatous fibers, secondary xylem (tracheary elements), and of the anther endocethium, which is necessary for anther dehiscence. May also regulate the seco…	0.921
MYB83	VND7	AT3G08500.1	AT1G71930.1	Transcription factor myb, plant; Transcription factor that acts as molecular switch in the NAC012/SND1-mediated transcriptional network regulating secondary wall biosynthesis. Is directly activated by NAC012/SND1 and its close homologs, including NAC043/NST1, NAC066/NST2, NAC101/VND6 and NAC030/VND7. Is required for functional expression of a number of secondary wall-associated transcription fact…	Arabidopsis nac domain containing protein 30; Transcription activator that binds to the secondary wall NAC binding element (SNBE), 5'- (T/A)NN(C/T)(T/C/G)TNNNNNNNA(A/C)GN(A/C/T)(A/T)-3', in the promoter of target genes (e.g. genes involved in secondary wall biosynthesis, cell wall modification such as xylan accumulation, and programmed cell death) Involved in xylem formation in roots and shoots, …	0.921
MYB83	WRKY12	AT3G08500.1	AT2G44745.1	Transcription factor myb, plant; Transcription factor that acts as molecular switch in the NAC012/SND1-mediated transcriptional network regulating secondary wall biosynthesis. Is directly activated by NAC012/SND1 and its close homologs, including NAC043/NST1, NAC066/NST2, NAC101/VND6 and NAC030/VND7. Is required for functional expression of a number of secondary wall-associated transcription fact…	Probable WRKY transcription factor 12; Transcription factor. Interacts specifically with the W box (5'-(T)TGAC[CT]-3'), a frequently occurring elicitor- responsive cis-acting element (By similarity)	0.63
MYB85	NAC012	AT4G22680.1	AT1G32770.1	Myb family transcription factor; Encodes a putative transcription factor (MYB85)	Nac secondary wall thickening promoting 3; NAC domain containing protein 12; Transcriptional activator of genes involved in biosynthesis of secondary walls. Together with NST1, required for the secondary cell wall thickening and lignification of sclerenchymatous fibers and secondary xylem vessels (tracheary elements). Seems to repress the secondary cell wall thickening of xylary fibers. May also …	0.912
MYB85	NAC066	AT4G22680.1	AT3G61910.1	Myb family transcription factor; Encodes a putative transcription factor (MYB85)	Nac secondary wall thickening promoting factor2; NAC domain-containing protein 66; Transcription activator of genes involved in biosynthesis of secondary walls. Together with NST1, required for the secondary cell wall thickening of the anther endocethium, which is necessary for anther dehiscence. May also regulate the secondary cell wall lignification of other tissues such as tracheary elements	0.849
MYB85	NST1	AT4G22680.1	AT2G46770.1	Myb family transcription factor; Encodes a putative transcription factor (MYB85)	NAC (No Apical Meristem) domain transcriptional regulator superfamily protein; Transcription activator of genes involved in biosynthesis of secondary walls. Together with NST2 and NST3, required for the secondary cell wall thickening of sclerenchymatous fibers, secondary xylem (tracheary elements), and of the anther endocethium, which is necessary for anther dehiscence. May also regulate the seco…	0.852
MYB85	VND7	AT4G22680.1	AT1G71930.1	Myb family transcription factor; Encodes a putative transcription factor (MYB85)	Arabidopsis nac domain containing protein 30; Transcription activator that binds to the secondary wall NAC binding element (SNBE), 5'- (T/A)NN(C/T)(T/C/G)TNNNNNNNA(A/C)GN(A/C/T)(A/T)-3', in the promoter of target genes (e.g. genes involved in secondary wall biosynthesis, cell wall modification such as xylan accumulation, and programmed cell death) Involved in xylem formation in roots and shoots, …	0.758
MYB85	WRKY12	AT4G22680.1	AT2G44745.1	Myb family transcription factor; Encodes a putative transcription factor (MYB85)	Probable WRKY transcription factor 12; Transcription factor. Interacts specifically with the W box (5'-(T)TGAC[CT]-3'), a frequently occurring elicitor- responsive cis-acting element (By similarity)	0.607
NAC012	WRKY12	AT1G32770.1	AT2G44745.1	Nac secondary wall thickening promoting 3; NAC domain containing protein 12; Transcriptional activator of genes involved in biosynthesis of secondary walls. Together with NST1, required for the secondary cell wall thickening and lignification of sclerenchymatous fibers and secondary xylem vessels (tracheary elements). Seems to repress the secondary cell wall thickening of xylary fibers. May also …	Probable WRKY transcription factor 12; Transcription factor. Interacts specifically with the W box (5'-(T)TGAC[CT]-3'), a frequently occurring elicitor- responsive cis-acting element (By similarity)	0.62
NAC066	WRKY12	AT3G61910.1	AT2G44745.1	Nac secondary wall thickening promoting factor2; NAC domain-containing protein 66; Transcription activator of genes involved in biosynthesis of secondary walls. Together with NST1, required for the secondary cell wall thickening of the anther endocethium, which is necessary for anther dehiscence. May also regulate the secondary cell wall lignification of other tissues such as tracheary elements	Probable WRKY transcription factor 12; Transcription factor. Interacts specifically with the W box (5'-(T)TGAC[CT]-3'), a frequently occurring elicitor- responsive cis-acting element (By similarity)	0.823
NST1	WRKY12	AT2G46770.1	AT2G44745.1	NAC (No Apical Meristem) domain transcriptional regulator superfamily protein; Transcription activator of genes involved in biosynthesis of secondary walls. Together with NST2 and NST3, required for the secondary cell wall thickening of sclerenchymatous fibers, secondary xylem (tracheary elements), and of the anther endocethium, which is necessary for anther dehiscence. May also regulate the seco…	Probable WRKY transcription factor 12; Transcription factor. Interacts specifically with the W box (5'-(T)TGAC[CT]-3'), a frequently occurring elicitor- responsive cis-acting element (By similarity)	0.629
RGL1	WRKY12	AT1G66350.1	AT2G44745.1	DELLA protein RGL1; Probable transcriptional regulator that acts as a repressor of the gibberellin (GA) signaling pathway. No effect of the BOI proteins on its stability. Probably acts by participating in large multiprotein complexes that repress transcription of GA- inducible genes. Has overlapping but distinct roles in GA signaling compared to RGA and GAI. Regulates the floral development. May …	Probable WRKY transcription factor 12; Transcription factor. Interacts specifically with the W box (5'-(T)TGAC[CT]-3'), a frequently occurring elicitor- responsive cis-acting element (By similarity)	0.69
UFO	WRKY12	AT1G30950.1	AT2G44745.1	Protein UNUSUAL FLORAL ORGANS; Component of SCF(ASK-cullin-F-box) E3 ubiquitin ligase complexes, which may mediate the ubiquitination and subsequent proteasomal degradation of target proteins (By similarity). Considered as a meristem identity factor required for normal growth of the young floral meristem. Acts together with LEAFY to positively regulate the B class floral homeotic genes APETALA3 a…	Probable WRKY transcription factor 12; Transcription factor. Interacts specifically with the W box (5'-(T)TGAC[CT]-3'), a frequently occurring elicitor- responsive cis-acting element (By similarity)	0.666
VND7	WRKY12	AT1G71930.1	AT2G44745.1	Arabidopsis nac domain containing protein 30; Transcription activator that binds to the secondary wall NAC binding element (SNBE), 5'- (T/A)NN(C/T)(T/C/G)TNNNNNNNA(A/C)GN(A/C/T)(A/T)-3', in the promoter of target genes (e.g. genes involved in secondary wall biosynthesis, cell wall modification such as xylan accumulation, and programmed cell death) Involved in xylem formation in roots and shoots, …	Probable WRKY transcription factor 12; Transcription factor. Interacts specifically with the W box (5'-(T)TGAC[CT]-3'), a frequently occurring elicitor- responsive cis-acting element (By similarity)	0.615

## Sheet: Table S10
Table S10 Prediction of Gh_D12G0934 interactions
Node1	Node2	Node1 accession	Node2 accession	Node1 annotation	Node2 annotation	Score
ACT7	HAM3	AT5G09810.1	AT4G00150.1	Actin, other eukaryote; Actin-7; Actins are highly conserved proteins that are involved in various types of cell motility and are ubiquitously expressed in all eukaryotic cells. Essential component of cell cytoskeleton; plays an important role in cytoplasmic streaming, cell shape determination, cell division, organelle movement and extension growth. This is considered as one of the vegetative act…	Arabidopsis thaliana hairy meristem 3; GRAS family transcription factor; Probable transcription factor involved in plant development	0.708
ACT7	TIP2;2	AT5G09810.1	AT4G17340.1	Actin, other eukaryote; Actin-7; Actins are highly conserved proteins that are involved in various types of cell motility and are ubiquitously expressed in all eukaryotic cells. Essential component of cell cytoskeleton; plays an important role in cytoplasmic streaming, cell shape determination, cell division, organelle movement and extension growth. This is considered as one of the vegetative act…	Tonoplast intrinsic protein 2;2; Aquaporins facilitate the transport of water and small neutral solutes across cell membranes	0.598
ACT7	TIP2;3	AT5G09810.1	AT5G47450.1	Actin, other eukaryote; Actin-7; Actins are highly conserved proteins that are involved in various types of cell motility and are ubiquitously expressed in all eukaryotic cells. Essential component of cell cytoskeleton; plays an important role in cytoplasmic streaming, cell shape determination, cell division, organelle movement and extension growth. This is considered as one of the vegetative act…	Arabidopsis thaliana tonoplast intrinsic protein 2;3; Tonoplast intrinsic protein, transports ammonium (NH3) and methylammonium across the tonoplast membrane, gene expression shows diurnal regulation and is upregulated by ammonium (NH3); Belongs to the MIP/aquaporin (TC 1.A.8) family. TIP (TC 1.A.8.10) subfamily	0.598
ACT7	WOX4	AT5G09810.1	AT1G46480.1	Actin, other eukaryote; Actin-7; Actins are highly conserved proteins that are involved in various types of cell motility and are ubiquitously expressed in all eukaryotic cells. Essential component of cell cytoskeleton; plays an important role in cytoplasmic streaming, cell shape determination, cell division, organelle movement and extension growth. This is considered as one of the vegetative act…	Encodes a WUSCHEL-related homeobox gene family member with 65 amino acids in its homeodomain. Proteins in this family contain a sequence of eight residues (TLPLFPMH) downstream of the homeodomain called the WUS box. This protein also contains an acidic domain approximately 10 residues upstream of the WUS box. Part of the TDIF-TDR-WOX4 signaling pathway that plays a crucial role in the maintenance…	0.692
ASL5	HAM3	AT2G30130.1	AT4G00150.1	Lateral organ boundaries (LOB) domain family protein; Overexpression/activation tagged allele has epinastic leaves, reduced apical dominance and is sterile. Gene is similar to asymmetric leaves (AS)/lateral organ boundary (LOB) genes which repress KNOX gene expression	Arabidopsis thaliana hairy meristem 3; GRAS family transcription factor; Probable transcription factor involved in plant development	0.687
ASL5	TIP2;2	AT2G30130.1	AT4G17340.1	Lateral organ boundaries (LOB) domain family protein; Overexpression/activation tagged allele has epinastic leaves, reduced apical dominance and is sterile. Gene is similar to asymmetric leaves (AS)/lateral organ boundary (LOB) genes which repress KNOX gene expression	Tonoplast intrinsic protein 2;2; Aquaporins facilitate the transport of water and small neutral solutes across cell membranes	0.416
ASL5	TIP2;3	AT2G30130.1	AT5G47450.1	Lateral organ boundaries (LOB) domain family protein; Overexpression/activation tagged allele has epinastic leaves, reduced apical dominance and is sterile. Gene is similar to asymmetric leaves (AS)/lateral organ boundary (LOB) genes which repress KNOX gene expression	Arabidopsis thaliana tonoplast intrinsic protein 2;3; Tonoplast intrinsic protein, transports ammonium (NH3) and methylammonium across the tonoplast membrane, gene expression shows diurnal regulation and is upregulated by ammonium (NH3); Belongs to the MIP/aquaporin (TC 1.A.8) family. TIP (TC 1.A.8.10) subfamily	0.495
AT2G37650	HAM3	AT2G37650.1	AT4G00150.1	GRAS family transcription factor; Probable transcription factor involved in plant development	Arabidopsis thaliana hairy meristem 3; GRAS family transcription factor; Probable transcription factor involved in plant development	0.64
HAM3	REV	AT4G00150.1	AT5G60690.1	Arabidopsis thaliana hairy meristem 3; GRAS family transcription factor; Probable transcription factor involved in plant development	Homeobox-leucine zipper family protein / lipid-binding START domain-containing protein; Probable transcription factor involved in the regulation of interfascicular fiber (cortical cells) and secondary xylem differentiation in the inflorescence stems. Required for lateral shoot meristems (LSMs) and flower meristems (FMs) initiation. May be involved in the determination of vascular patterning and o…	0.629
HAM3	TIP2;2	AT4G00150.1	AT4G17340.1	Arabidopsis thaliana hairy meristem 3; GRAS family transcription factor; Probable transcription factor involved in plant development	Tonoplast intrinsic protein 2;2; Aquaporins facilitate the transport of water and small neutral solutes across cell membranes	0.846
HAM3	TIP2;3	AT4G00150.1	AT5G47450.1	Arabidopsis thaliana hairy meristem 3; GRAS family transcription factor; Probable transcription factor involved in plant development	Arabidopsis thaliana tonoplast intrinsic protein 2;3; Tonoplast intrinsic protein, transports ammonium (NH3) and methylammonium across the tonoplast membrane, gene expression shows diurnal regulation and is upregulated by ammonium (NH3); Belongs to the MIP/aquaporin (TC 1.A.8) family. TIP (TC 1.A.8.10) subfamily	0.846
HAM3	WOX4	AT4G00150.1	AT1G46480.1	Arabidopsis thaliana hairy meristem 3; GRAS family transcription factor; Probable transcription factor involved in plant development	Encodes a WUSCHEL-related homeobox gene family member with 65 amino acids in its homeodomain. Proteins in this family contain a sequence of eight residues (TLPLFPMH) downstream of the homeodomain called the WUS box. This protein also contains an acidic domain approximately 10 residues upstream of the WUS box. Part of the TDIF-TDR-WOX4 signaling pathway that plays a crucial role in the maintenance…	0.879
HAM3	WOX5	AT4G00150.1	AT3G11260.1	Arabidopsis thaliana hairy meristem 3; GRAS family transcription factor; Probable transcription factor involved in plant development	Wuschel related homeobox 5b; WUSCHEL related homeobox 5; Transcription factor, which may be involved in the specification and maintenance of the stem cells (QC cells) in the root apical meristem (RAM)	0.866
HAM3	WOX7	AT4G00150.1	AT5G05770.1	Arabidopsis thaliana hairy meristem 3; GRAS family transcription factor; Probable transcription factor involved in plant development	Wuschel related homeobox 5a; Encodes a WUSCHEL-related homeobox gene family member with 65 amino acids in its homeodomain. Proteins in this family contain a sequence of eight residues (TLPLFPMH) downstream of the homeodomain called the WUS box	0.859
HAM3	WUS	AT4G00150.1	AT2G17950.1	Arabidopsis thaliana hairy meristem 3; GRAS family transcription factor; Probable transcription factor involved in plant development	Homeodomain-like superfamily protein; Transcription factor that plays a central role during early embryogenesis, oogenesis and flowering, probably by regulating expression of specific genes. Required to specify stem cell identity in meristems, such as shoot apical meristem (SAM). May induce shoot stem cells activity in order to maintain the stem cell identity. Involved in the developmental root m…	0.798
TIP2;2	WOX4	AT4G17340.1	AT1G46480.1	Tonoplast intrinsic protein 2;2; Aquaporins facilitate the transport of water and small neutral solutes across cell membranes	Encodes a WUSCHEL-related homeobox gene family member with 65 amino acids in its homeodomain. Proteins in this family contain a sequence of eight residues (TLPLFPMH) downstream of the homeodomain called the WUS box. This protein also contains an acidic domain approximately 10 residues upstream of the WUS box. Part of the TDIF-TDR-WOX4 signaling pathway that plays a crucial role in the maintenance…	0.619
TIP2;2	WOX5	AT4G17340.1	AT3G11260.1	Tonoplast intrinsic protein 2;2; Aquaporins facilitate the transport of water and small neutral solutes across cell membranes	Wuschel related homeobox 5b; WUSCHEL related homeobox 5; Transcription factor, which may be involved in the specification and maintenance of the stem cells (QC cells) in the root apical meristem (RAM)	0.546
TIP2;2	WOX7	AT4G17340.1	AT5G05770.1	Tonoplast intrinsic protein 2;2; Aquaporins facilitate the transport of water and small neutral solutes across cell membranes	Wuschel related homeobox 5a; Encodes a WUSCHEL-related homeobox gene family member with 65 amino acids in its homeodomain. Proteins in this family contain a sequence of eight residues (TLPLFPMH) downstream of the homeodomain called the WUS box	0.546
TIP2;3	WOX4	AT5G47450.1	AT1G46480.1	Arabidopsis thaliana tonoplast intrinsic protein 2;3; Tonoplast intrinsic protein, transports ammonium (NH3) and methylammonium across the tonoplast membrane, gene expression shows diurnal regulation and is upregulated by ammonium (NH3); Belongs to the MIP/aquaporin (TC 1.A.8) family. TIP (TC 1.A.8.10) subfamily	Encodes a WUSCHEL-related homeobox gene family member with 65 amino acids in its homeodomain. Proteins in this family contain a sequence of eight residues (TLPLFPMH) downstream of the homeodomain called the WUS box. This protein also contains an acidic domain approximately 10 residues upstream of the WUS box. Part of the TDIF-TDR-WOX4 signaling pathway that plays a crucial role in the maintenance…	0.619
TIP2;3	WOX5	AT5G47450.1	AT3G11260.1	Arabidopsis thaliana tonoplast intrinsic protein 2;3; Tonoplast intrinsic protein, transports ammonium (NH3) and methylammonium across the tonoplast membrane, gene expression shows diurnal regulation and is upregulated by ammonium (NH3); Belongs to the MIP/aquaporin (TC 1.A.8) family. TIP (TC 1.A.8.10) subfamily	Wuschel related homeobox 5b; WUSCHEL related homeobox 5; Transcription factor, which may be involved in the specification and maintenance of the stem cells (QC cells) in the root apical meristem (RAM)	0.546
TIP2;3	WOX7	AT5G47450.1	AT5G05770.1	Arabidopsis thaliana tonoplast intrinsic protein 2;3; Tonoplast intrinsic protein, transports ammonium (NH3) and methylammonium across the tonoplast membrane, gene expression shows diurnal regulation and is upregulated by ammonium (NH3); Belongs to the MIP/aquaporin (TC 1.A.8) family. TIP (TC 1.A.8.10) subfamily	Wuschel related homeobox 5a; Encodes a WUSCHEL-related homeobox gene family member with 65 amino acids in its homeodomain. Proteins in this family contain a sequence of eight residues (TLPLFPMH) downstream of the homeodomain called the WUS box	0.546
						0.416
						0.879

[truncated: 2 more sheets: Table S11, Table S12]
